# Supplementary material for: Plasmon Polarization Induced Multi-Field Coupling in Molybdenum-Oxide Based Heterojunctions to Efficiently Hydrolyze Ammonia Borane
Source: Research Square preprint supplement (doi:10.21203/rs.3.rs-8058299/v1), 2025-11-21
Supplement: Supplementary file 1 [file e35bb699c98598f8dd2c14db.docx]

**Supporting Information**

**Plasmon Polarization Induced Multi-Field Coupling in Molybdenum-Oxide Based Heterojunctions to Efficiently Hydrolyze Ammonia Borane**

Pengcheng Liζ, Nengrong Tuζ, Yang Yang*, Junxiang Li, Huilin Hou, Dongjiang Yang* and Weiyou Yang*

*Institute of Micro/Nano Materials and Devices, Ningbo University of Technology, Ningbo City, 315211, P. R. China*

ζContribute equally to this work

*Corresponding Authors Emails: yangyangafterglow@yeah.net; [d.yang@qdu.edu.cn](mailto:d.yang@qdu.edu.cn); weiyouyang@tsinghua.org.cn

**Contents**

1. Supplementary Figures, Corresponding Discussions.
2. Supplementary References.


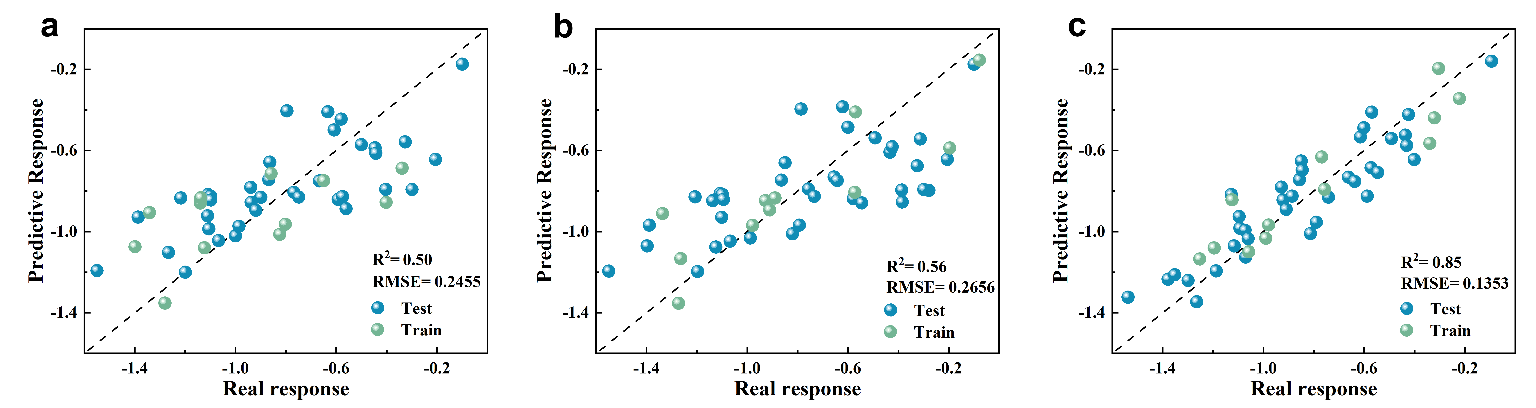


**Supplementary Fig. 1 | Different algorithms based on machine learning.** Root Mean Square Error (RMSE) and R2 (coefficient of determination) for **a** Matern 5-2 GPR, **b** Second rational GPR and **c** Average index GPR.


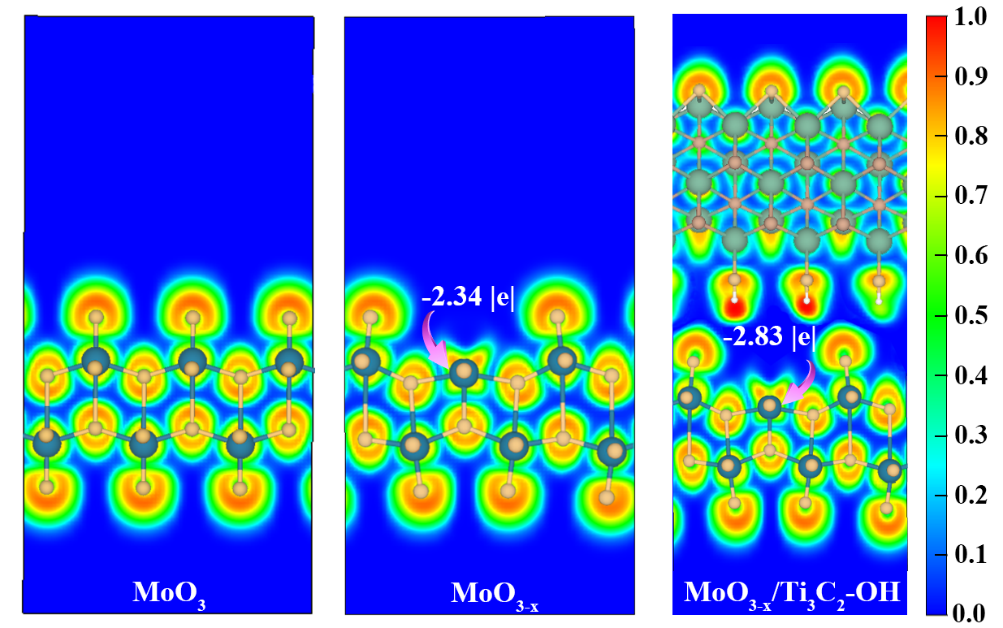


**Supplementary Fig. 2 | The electrons spatial distribution and charge density analysis.** ELF distribution map and Bader charge of MoO3, MoO3-x and MoO3-x/Ti3C2-OH.

Theoretical calculations show that the elevated carrier concentration drives the formation of an electron delocalization network on the catalyst surface by lowering the electron localization barriers, that is intuitively verified by the electron localization function (ELF) analysis. More importantly, Bader charge results also confirm that this complex electronic effect induces a dual facilitation mechanism: optimization of Lewis acidity at the active site through local charge enrichment on the one hand, and enhancement of the dynamic regulation of reactant adsorption through the delocalization electron cloud on the other.


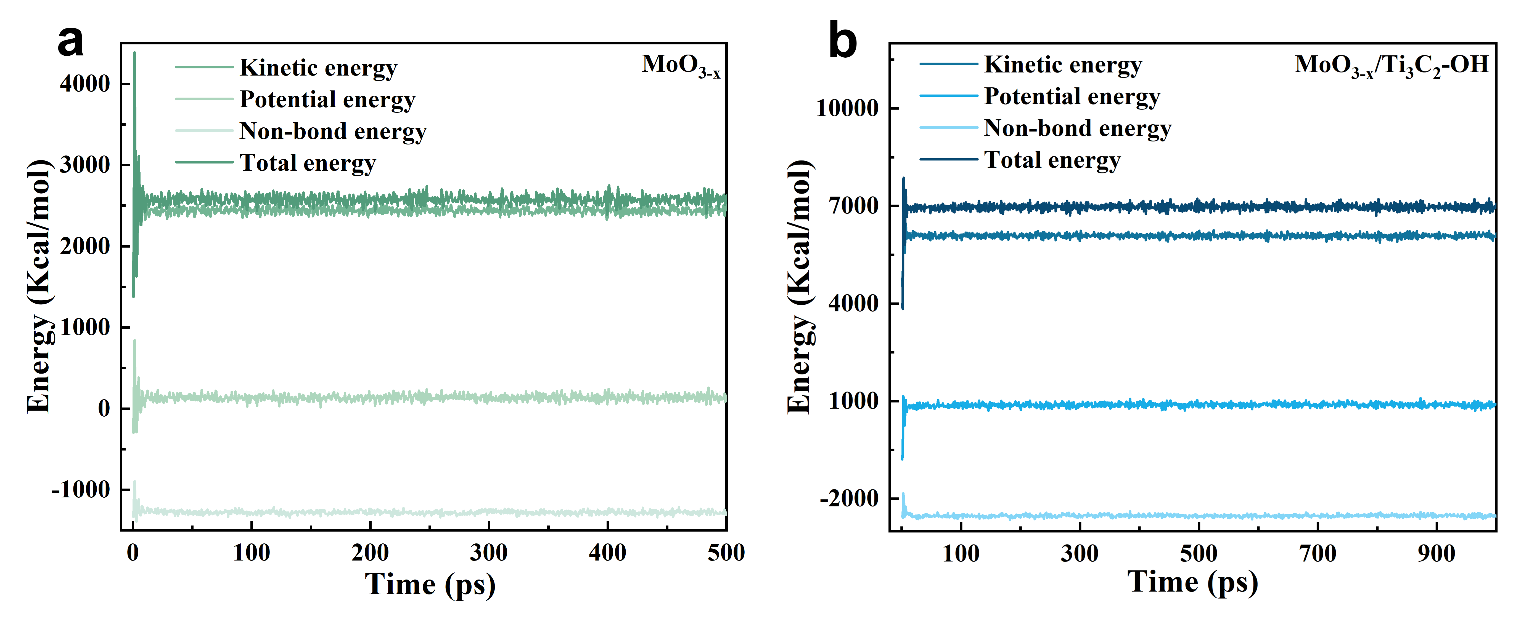


**Supplementary Fig. 3 | Monitoring of the equilibrium state of the system.** Plots of different energies over time in **a** MoO3-x and **b** MoO3-x/Ti3C2-OH systems.


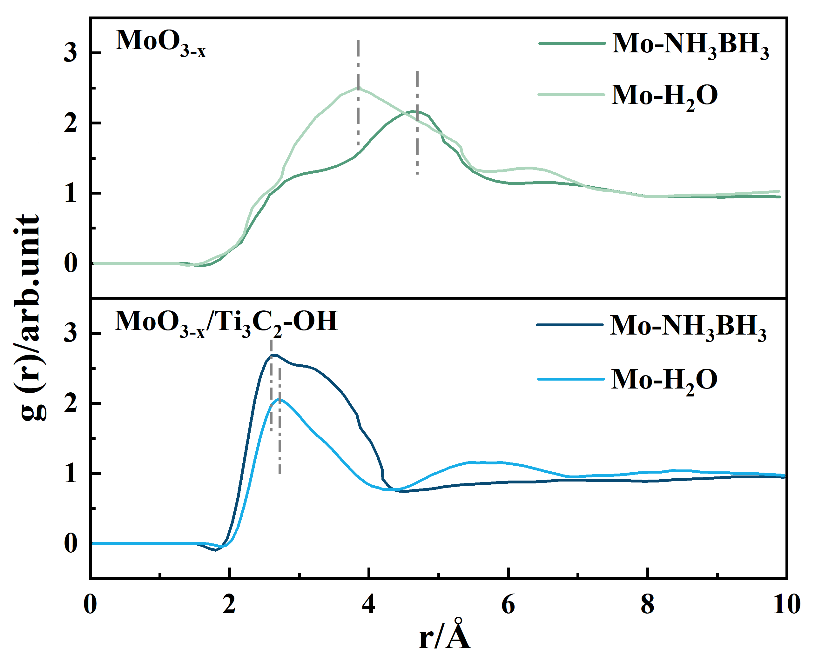


**Supplementary Fig. 4 | Orderliness analysis of the solution structure.** RDF curves of NH3BH3 and H2O interactions with MoO3-x and MoO3-x/Ti3C2-OH.

The radial distribution function (RDF) after the reaction solution has reached stability indicates that a water crust is preferentially formed on the surface of MoO3-x, occupying the active sites on the surface of the catalyst. The NH3BH3 curve around the active sites on the surface of MoO3-x/Ti3C2-OH exhibits a stronger peak (gr= 2.88) at 2.52 Å, and corresponding water curve shows a weaker peak (gr= 2.08) at 2.68 Å. This suggests that the higher concentration of AB around MoO3-x/Ti3C2-OH blocks the adsorption of H2O, resulting in the aggregation of H2O in the second shell layer.


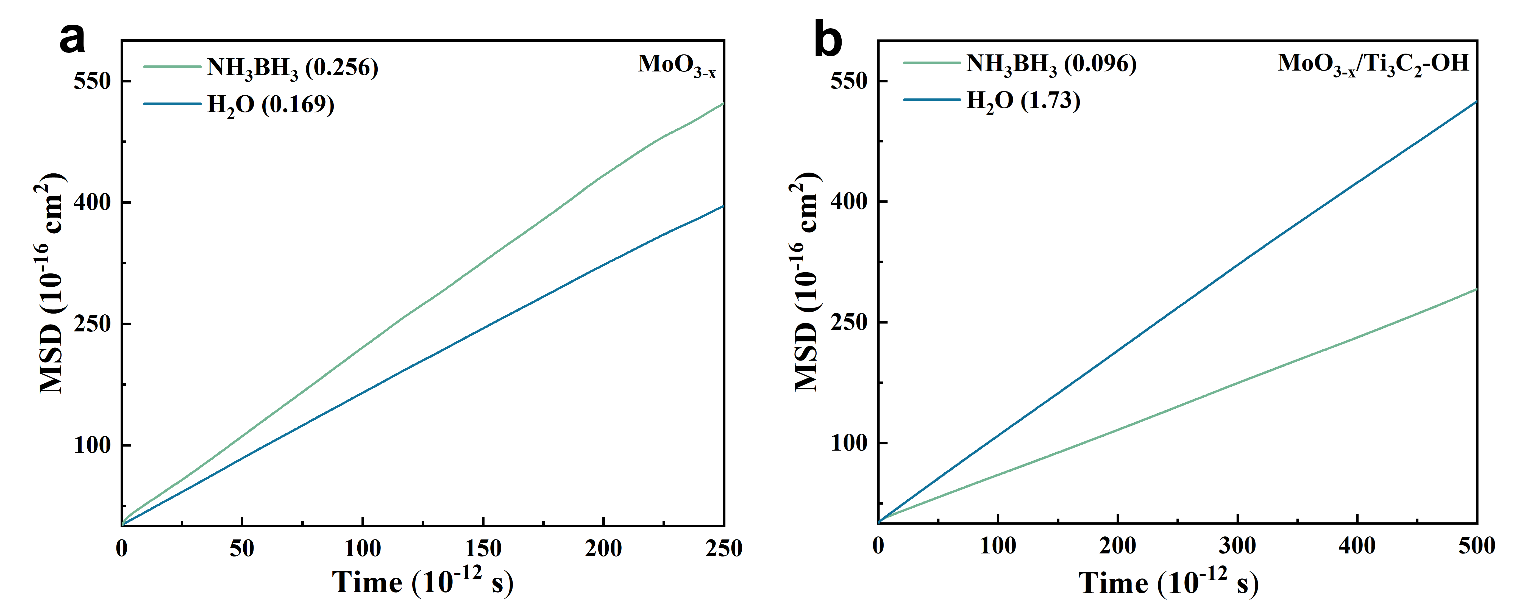


**Supplementary Fig. 5 | Analysis of Molecular Diffusion Capacity.** The mean square displacement (MSD) of NH3BH3 and H2O in **a** MoO3-x and **b** MoO3-x/Ti3C2-OH.

The differences in molecular diffusion behaviors in the two systems are further revealed by mean-square displacement (MSD) analysis and quantitative comparison of diffusion coefficients. The lower diffusion coefficients of NH3BH3 in MoO3-x compared with H2O indicates that the strong adsorption of H2O with the active sites weakens the free movement of H2O molecules and creates a localized water enrichment effect. It means that NH3BH3 and H2O are adsorbed on the surface of MoO3-x, respectively, belonging to the Langmuir-Hinshelwood mechanism (Supplementary Fig. 5a). In the MoO3-x/Ti3C2-OH system, the slope of the MSD curve for NH3BH3 is significantly lower than that of H2O, indicating that the diffusion of NH3BH3 around the active site is inhibited due to the strong adsorption of AB on the substrate, which is consistent with the conclusion of the RDF results. This difference in dynamic behavior demonstrates that Mδ+ active sites on the MoO3-x/Ti3C2-OH surface are synergistically regulated by steric hindrance and hydrophobic effects, limiting the proximity of water molecules while facilitating the targeted adsorption of AB to the reconstructed Moδ+ active site, attributed to the Eley-Rideal mechanism (Supplementary Fig. 5b).


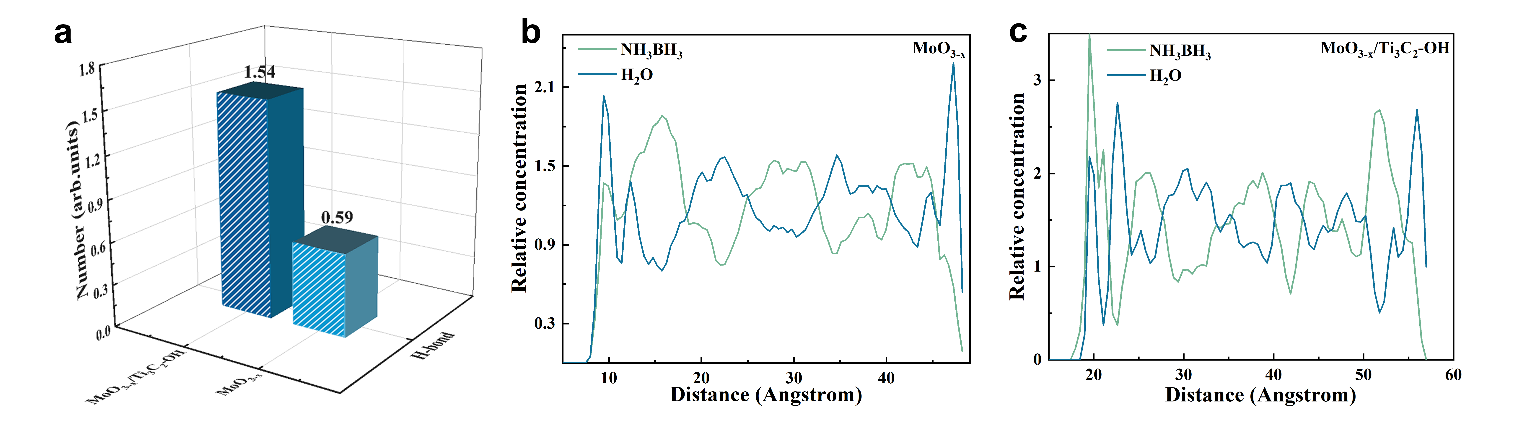


**Supplementary Fig. 6 |** **Intermolecular interactions and spatial distribution structure. a** Average number of hydrogen bonds per- interfacial water molecule and for different models. Concentration distribution of NH3BH3 and H2O along the Z-axis in **b** MoO3-x and **c** MoO3-x/Ti3C2-OH systems.

The hydrogen bonding network statistics and z-axis distribution curves exhibit that the adsorbed configuration of ABis strongly immobilized and the disordered oscillations of the molecule are reduced.


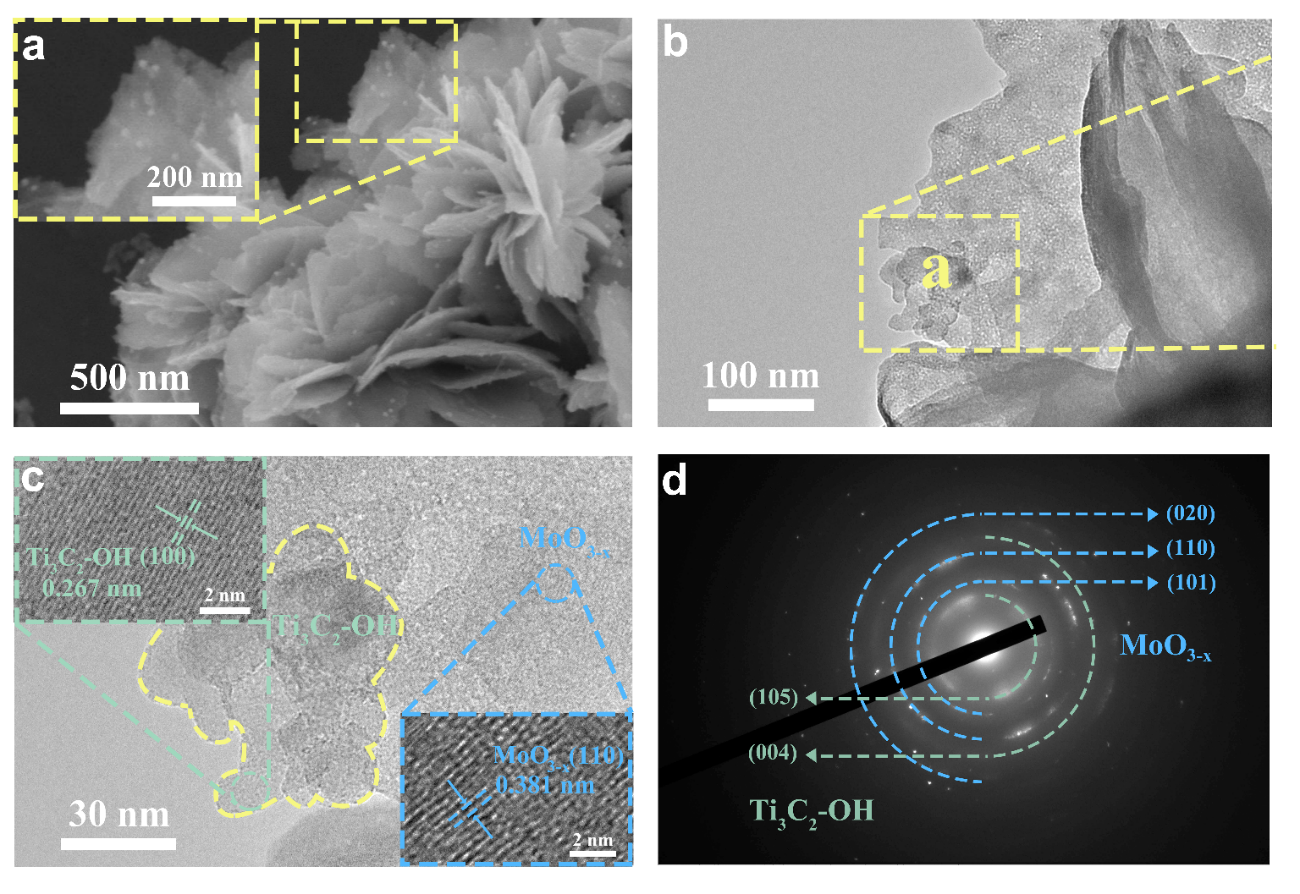


**Supplementary Fig. 7 | Morphological and structural characterization. a** SEM and **b** TEM images of as-obtained MoO3-x/Ti3C2-OHsample. **c** HRTEM images of MoO3-x/Ti3C2-OHrecorded from the marked area in a. **d** SAED pattern of MoO3-x/Ti3C2-OHrecorded from the marked area in a.

Specifically, the synthesis and morphological structure of the MoO3-x/Ti3C2-OH heterojunction are discussed. A simple synthesis route is implied to synthesize the heterostructure, Ti3C2-OH obtained by hydrothermal reaction in weak ammonia solution are subsequently adsorbed onto the surface of two-dimensional MoO3-x nanosheets served as a support. Scanning electron microscope (SEM) and transmission electron microscopy (TEM) images of the MoO3-x/Ti3C2-OH composite show that lots of 0D Ti3C2-OH are observed on a large piece of wrinkled ultrathin MoO3-x nanosheets (Supplementary Fig. 7a, b). As shown in the high-resolution TEM (HRTEM) images, the supporters with a spacing of 0.381 nm are mainly composed by MoO3-x as its characteristics (110) lattice fringes, and the modifiers with a spacing of 0.267 nm consist of Ti3C2-OH as its characteristics (100) lattice fringes. The lattice fringes of MoO3-x and Ti3C2-OH are interwoven with each other, demonstrating the formation of the heterostructure with an intimate interface (Supplementary Fig. 7c). The coexistence of the two component crystalline phases is further evidenced by the selected area electron diffraction (SAED) pattern, here the diffraction rings point to the diffraction planes (110), (101) and (020) for MoO3-x, as well as the (105) and (004) for Ti3C2-OH, respectively (Supplementary Fig. 7d).


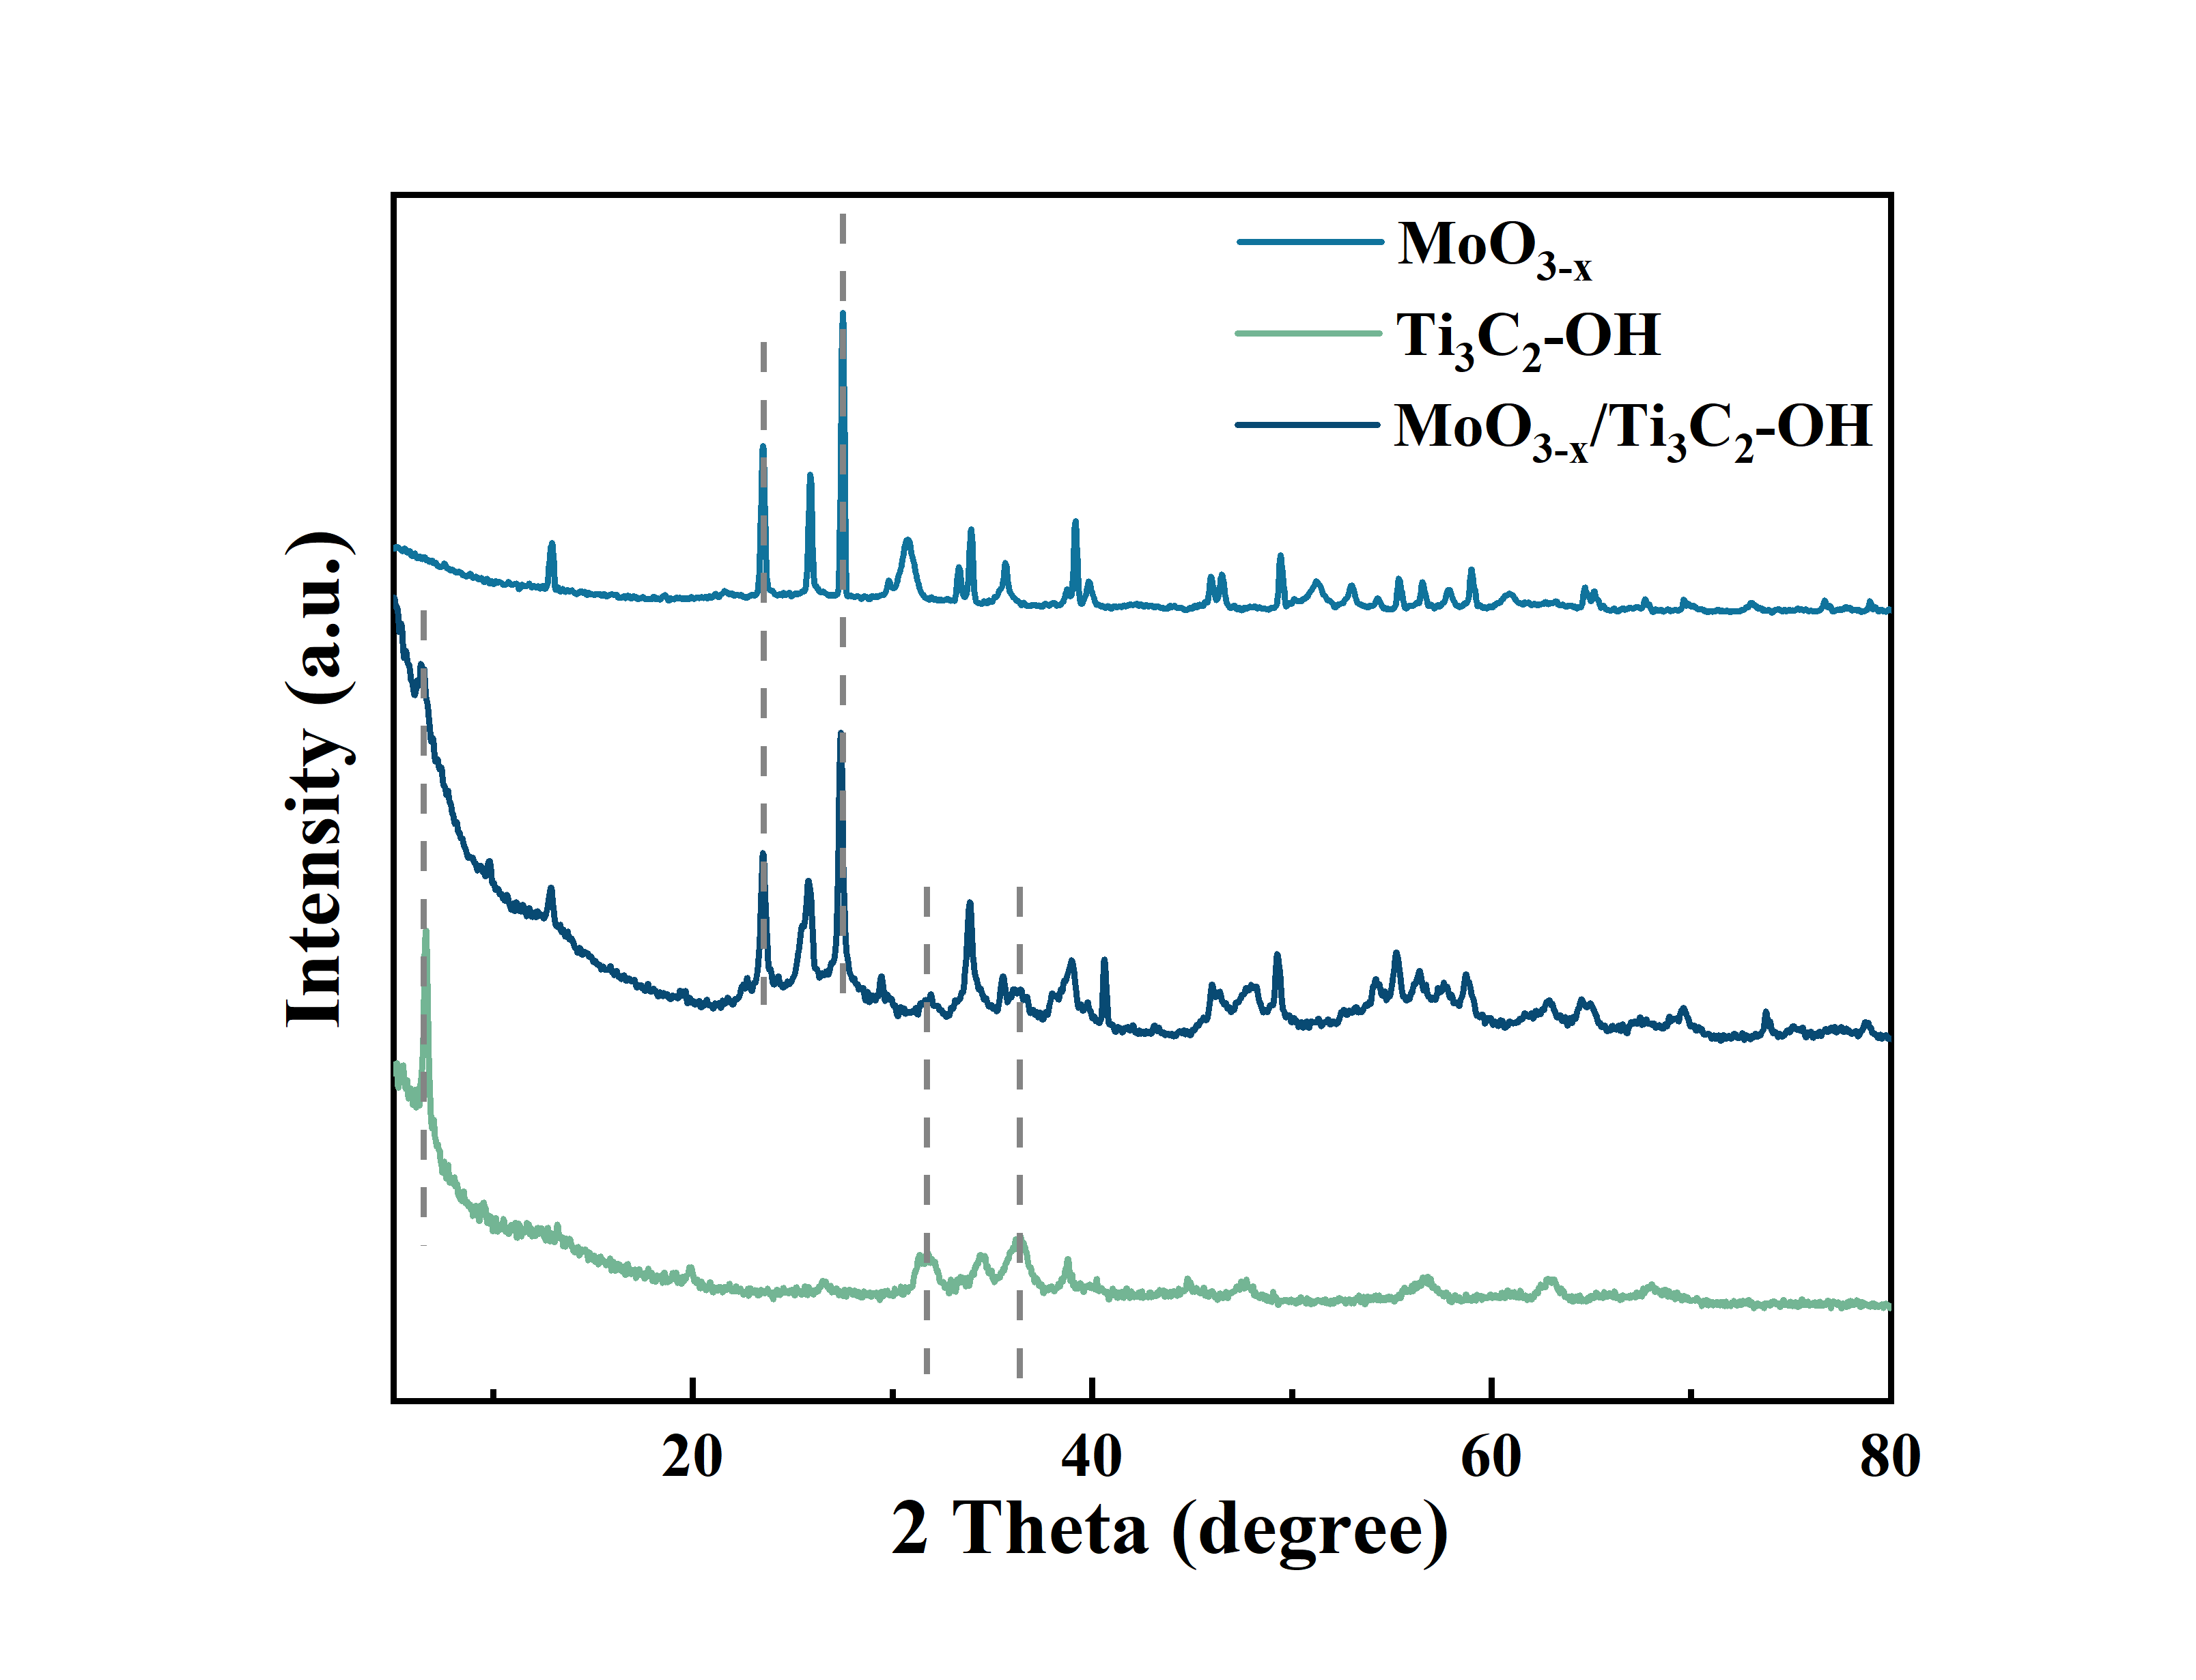


**Supplementary Fig. 8 |** XRD patterns of MoO3-x, Ti3C2-OH and MoO3-x/Ti3C2-OHsamples.


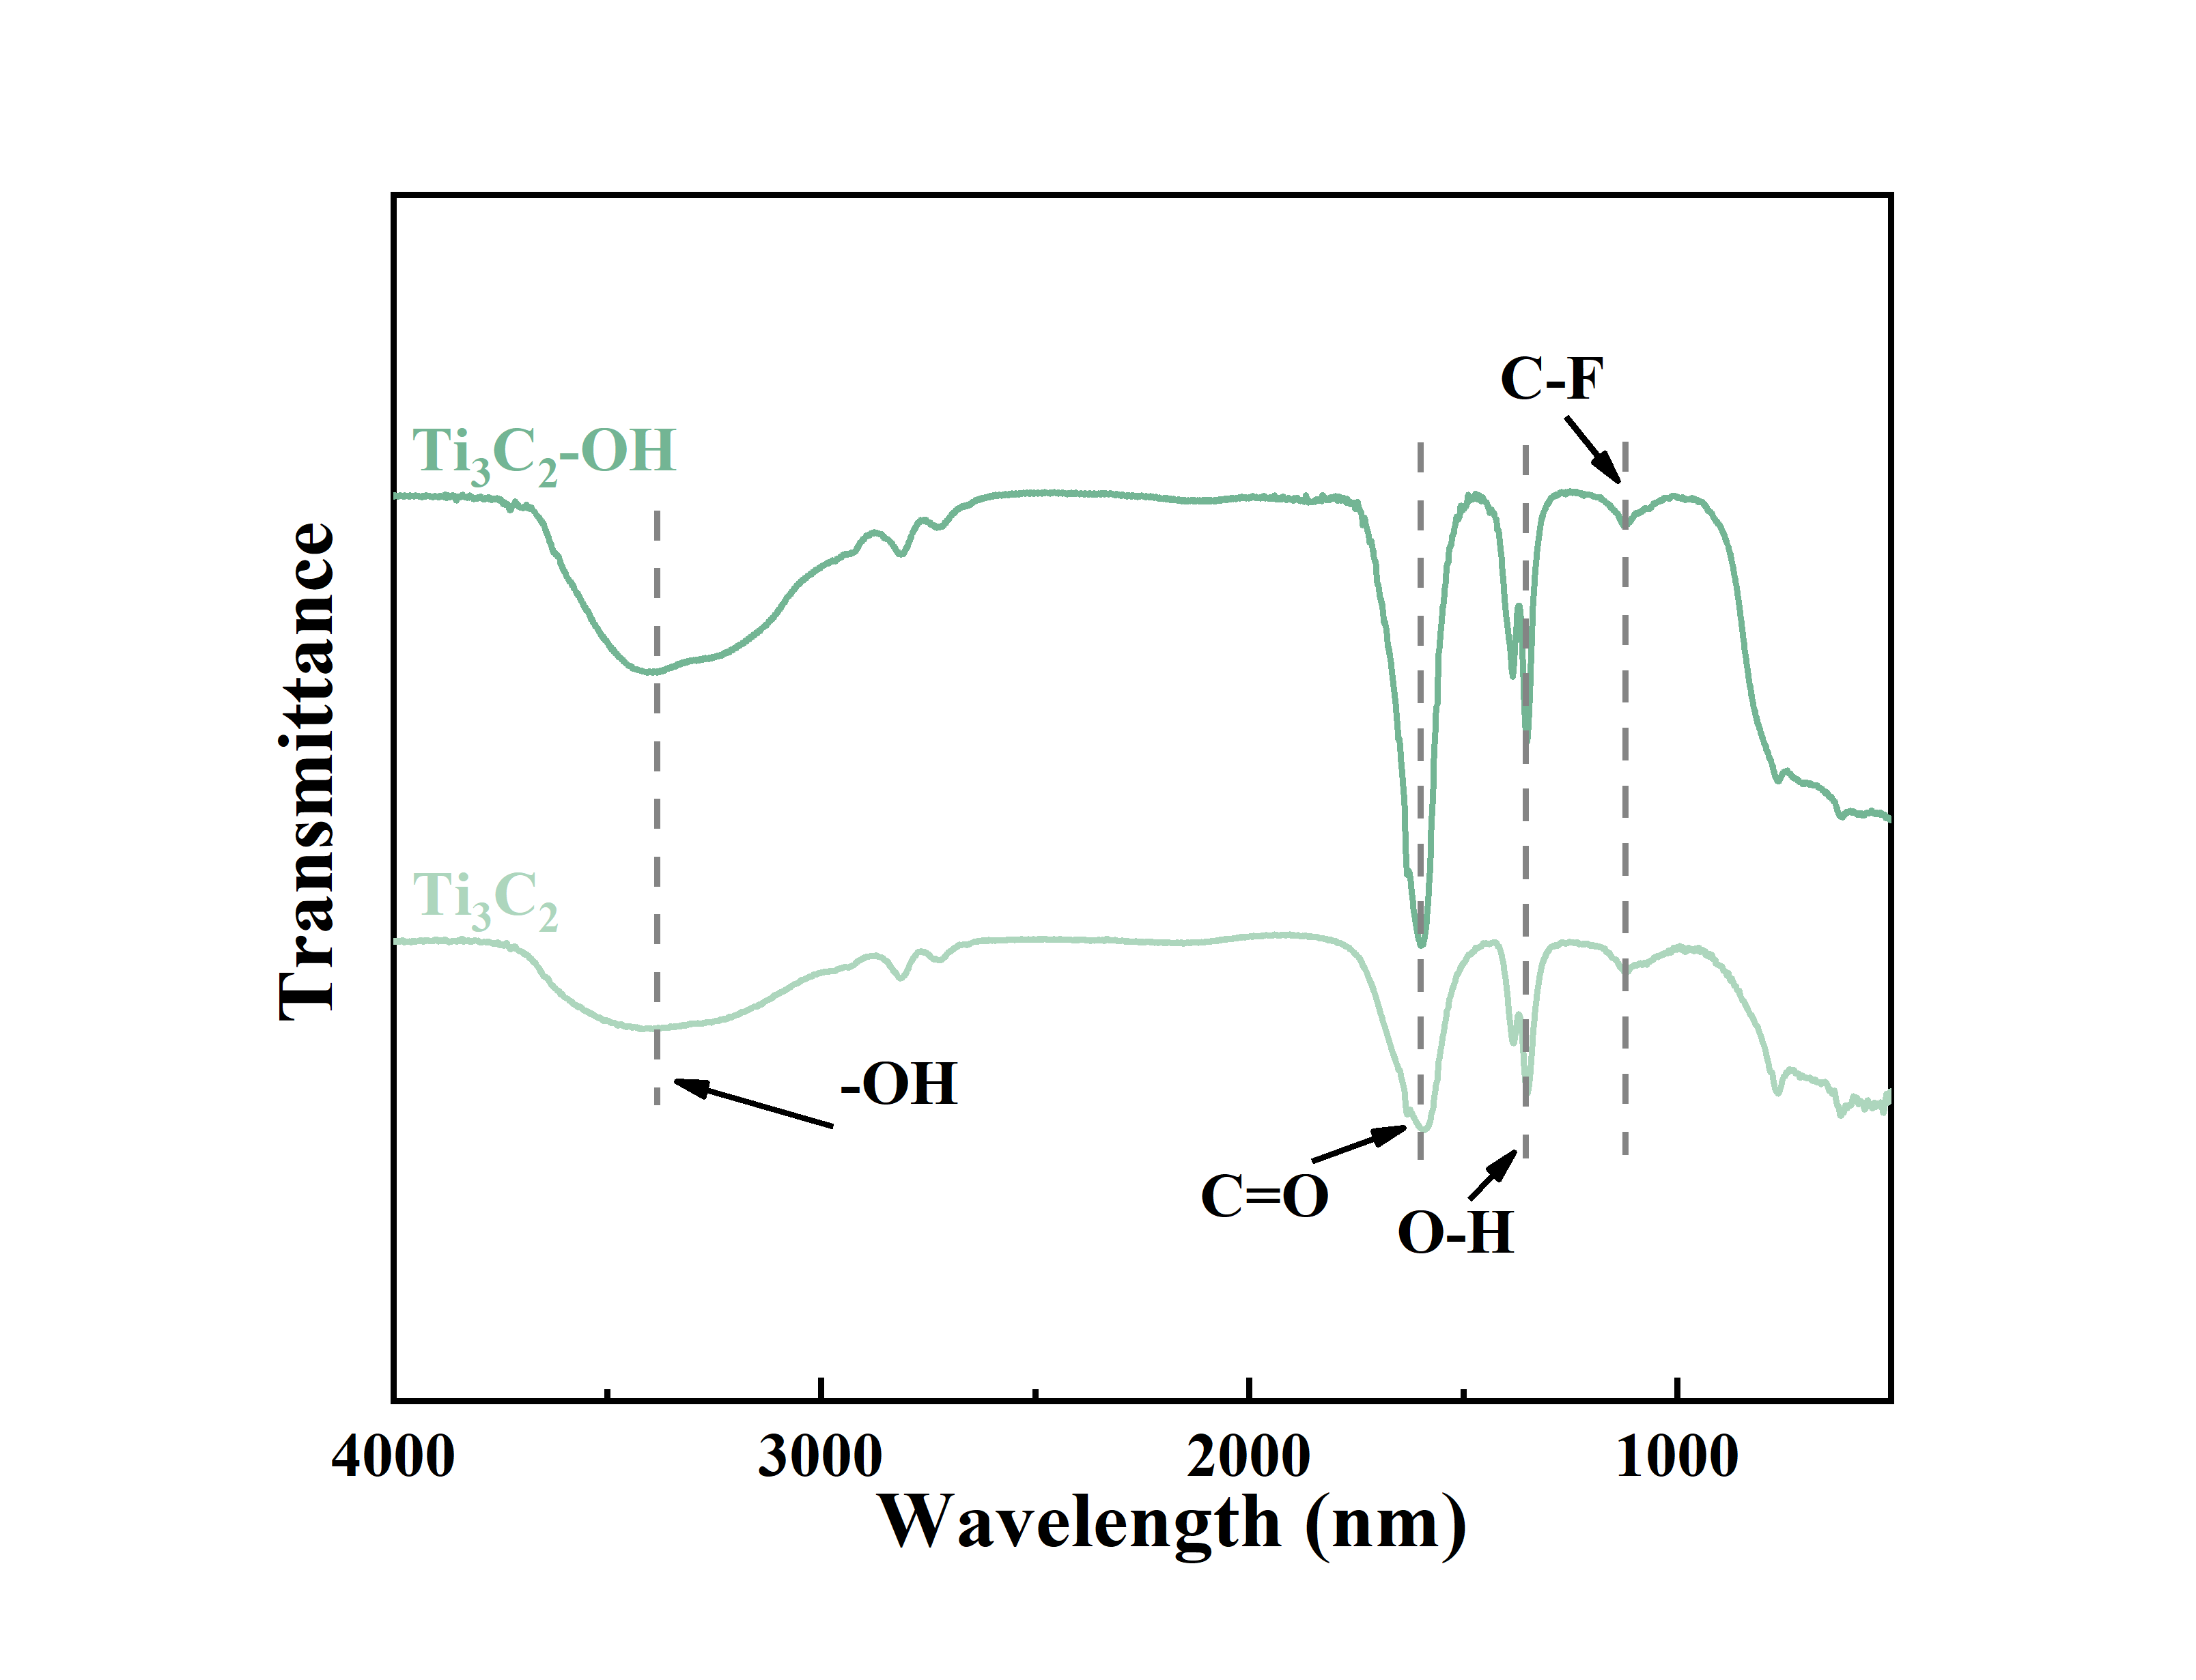


**Supplementary Fig. 9 |** FTIR spectra of Ti3C2 and Ti3C2-OH.

Under the thermal cutting effect of ammonia, the Ti3C2-OH with abundant -OH groups can be obtained by a facile hydrothermal reaction of precursor Ti3C2 nanosheets1,2. Fourier transformed infrared (FTIR) spectra reveal the identical stretching vibrations at about 620, 1650, and 3420 cm-1 in Ti3C2 nanosheets and Ti3C2-OH, corresponding to Ti-C, C=O, and -OH bonds deformation vibration, respectively. Significantly, the weakening of intensity ratio of C-F bond at 1100 cm−1 to -OH bond at 1395 cm−1 is observed in the Ti3C2-OH compared to Ti3C23,4. This result demonstrates that the -OHgroup can replace -F ones on the Ti3C2 surface in the ammonia solution.


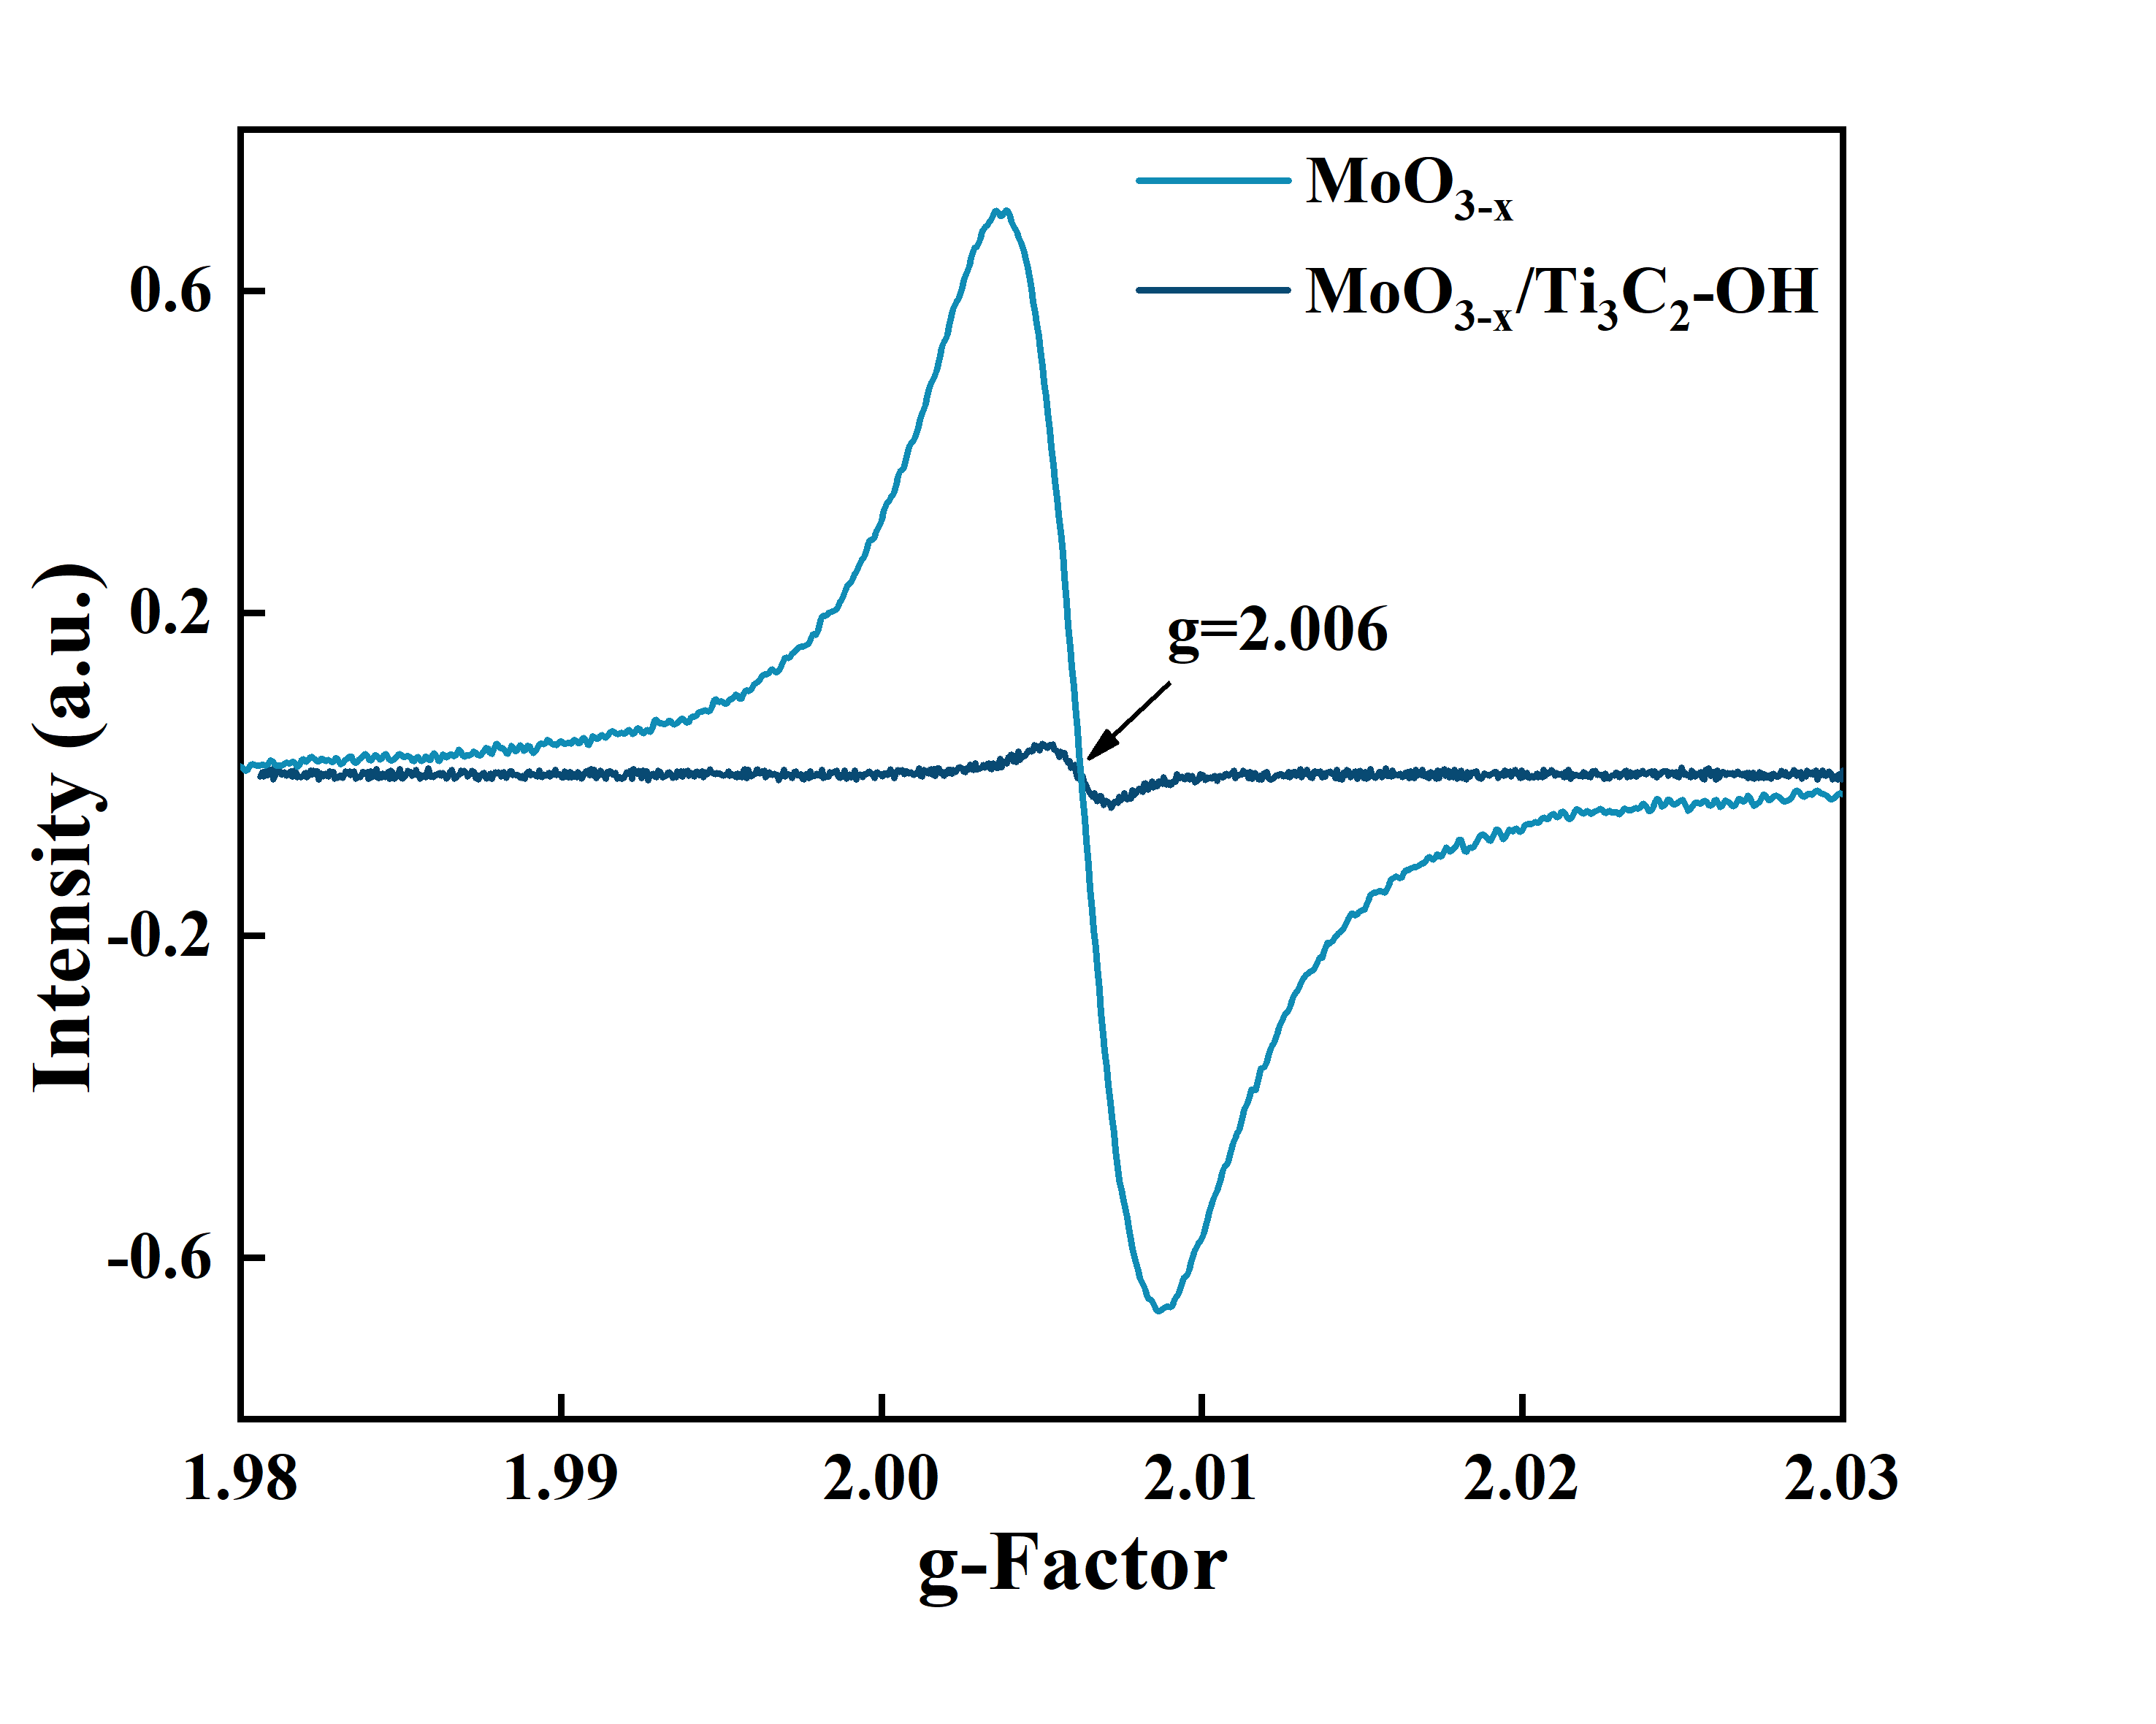


**Supplementary Fig. 10 |** EPR spectra of MoO3-x and MoO3-x /Ti3C2-OH.

MoO3-x possess rich in a large number of oxygen defects illustrated through electron paramagnetic resonance (EPR) analysis. The significant reduction in oxygen vacancies observed in MoO3-x when loaded with Ti3C2-OH is of particular interest.


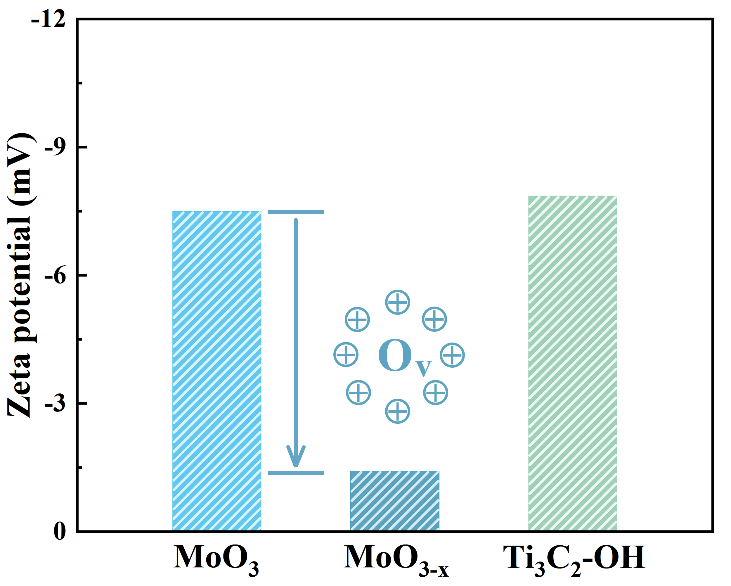


**Supplementary Fig. 11 |** Zeta potential distributions of MoO3, MoO3-x and Ti3C2-OH dispersions.

The Zeta potential of the prepared Ti3C2-OH nanosheets is -7.86 mV, which is attributed to the negatively charged -OH and -O at the end of the Ti3C2-OH surface. The zeta value of Moδ+ in MoO3-x shows a relatively positive potential compared to MoO3, due to the presence of positively charged oxygen vacancies. The -F group on the surface of Ti3C2 are replaced by the -OH group under thermal cleavage of ammonia and the significant reduction in oxygen vacancies observed in positively charged MoO3-x when loaded with hydroxyl-charged Ti3C2-OH is of particular interest (Supplementary Figs. 9-11).


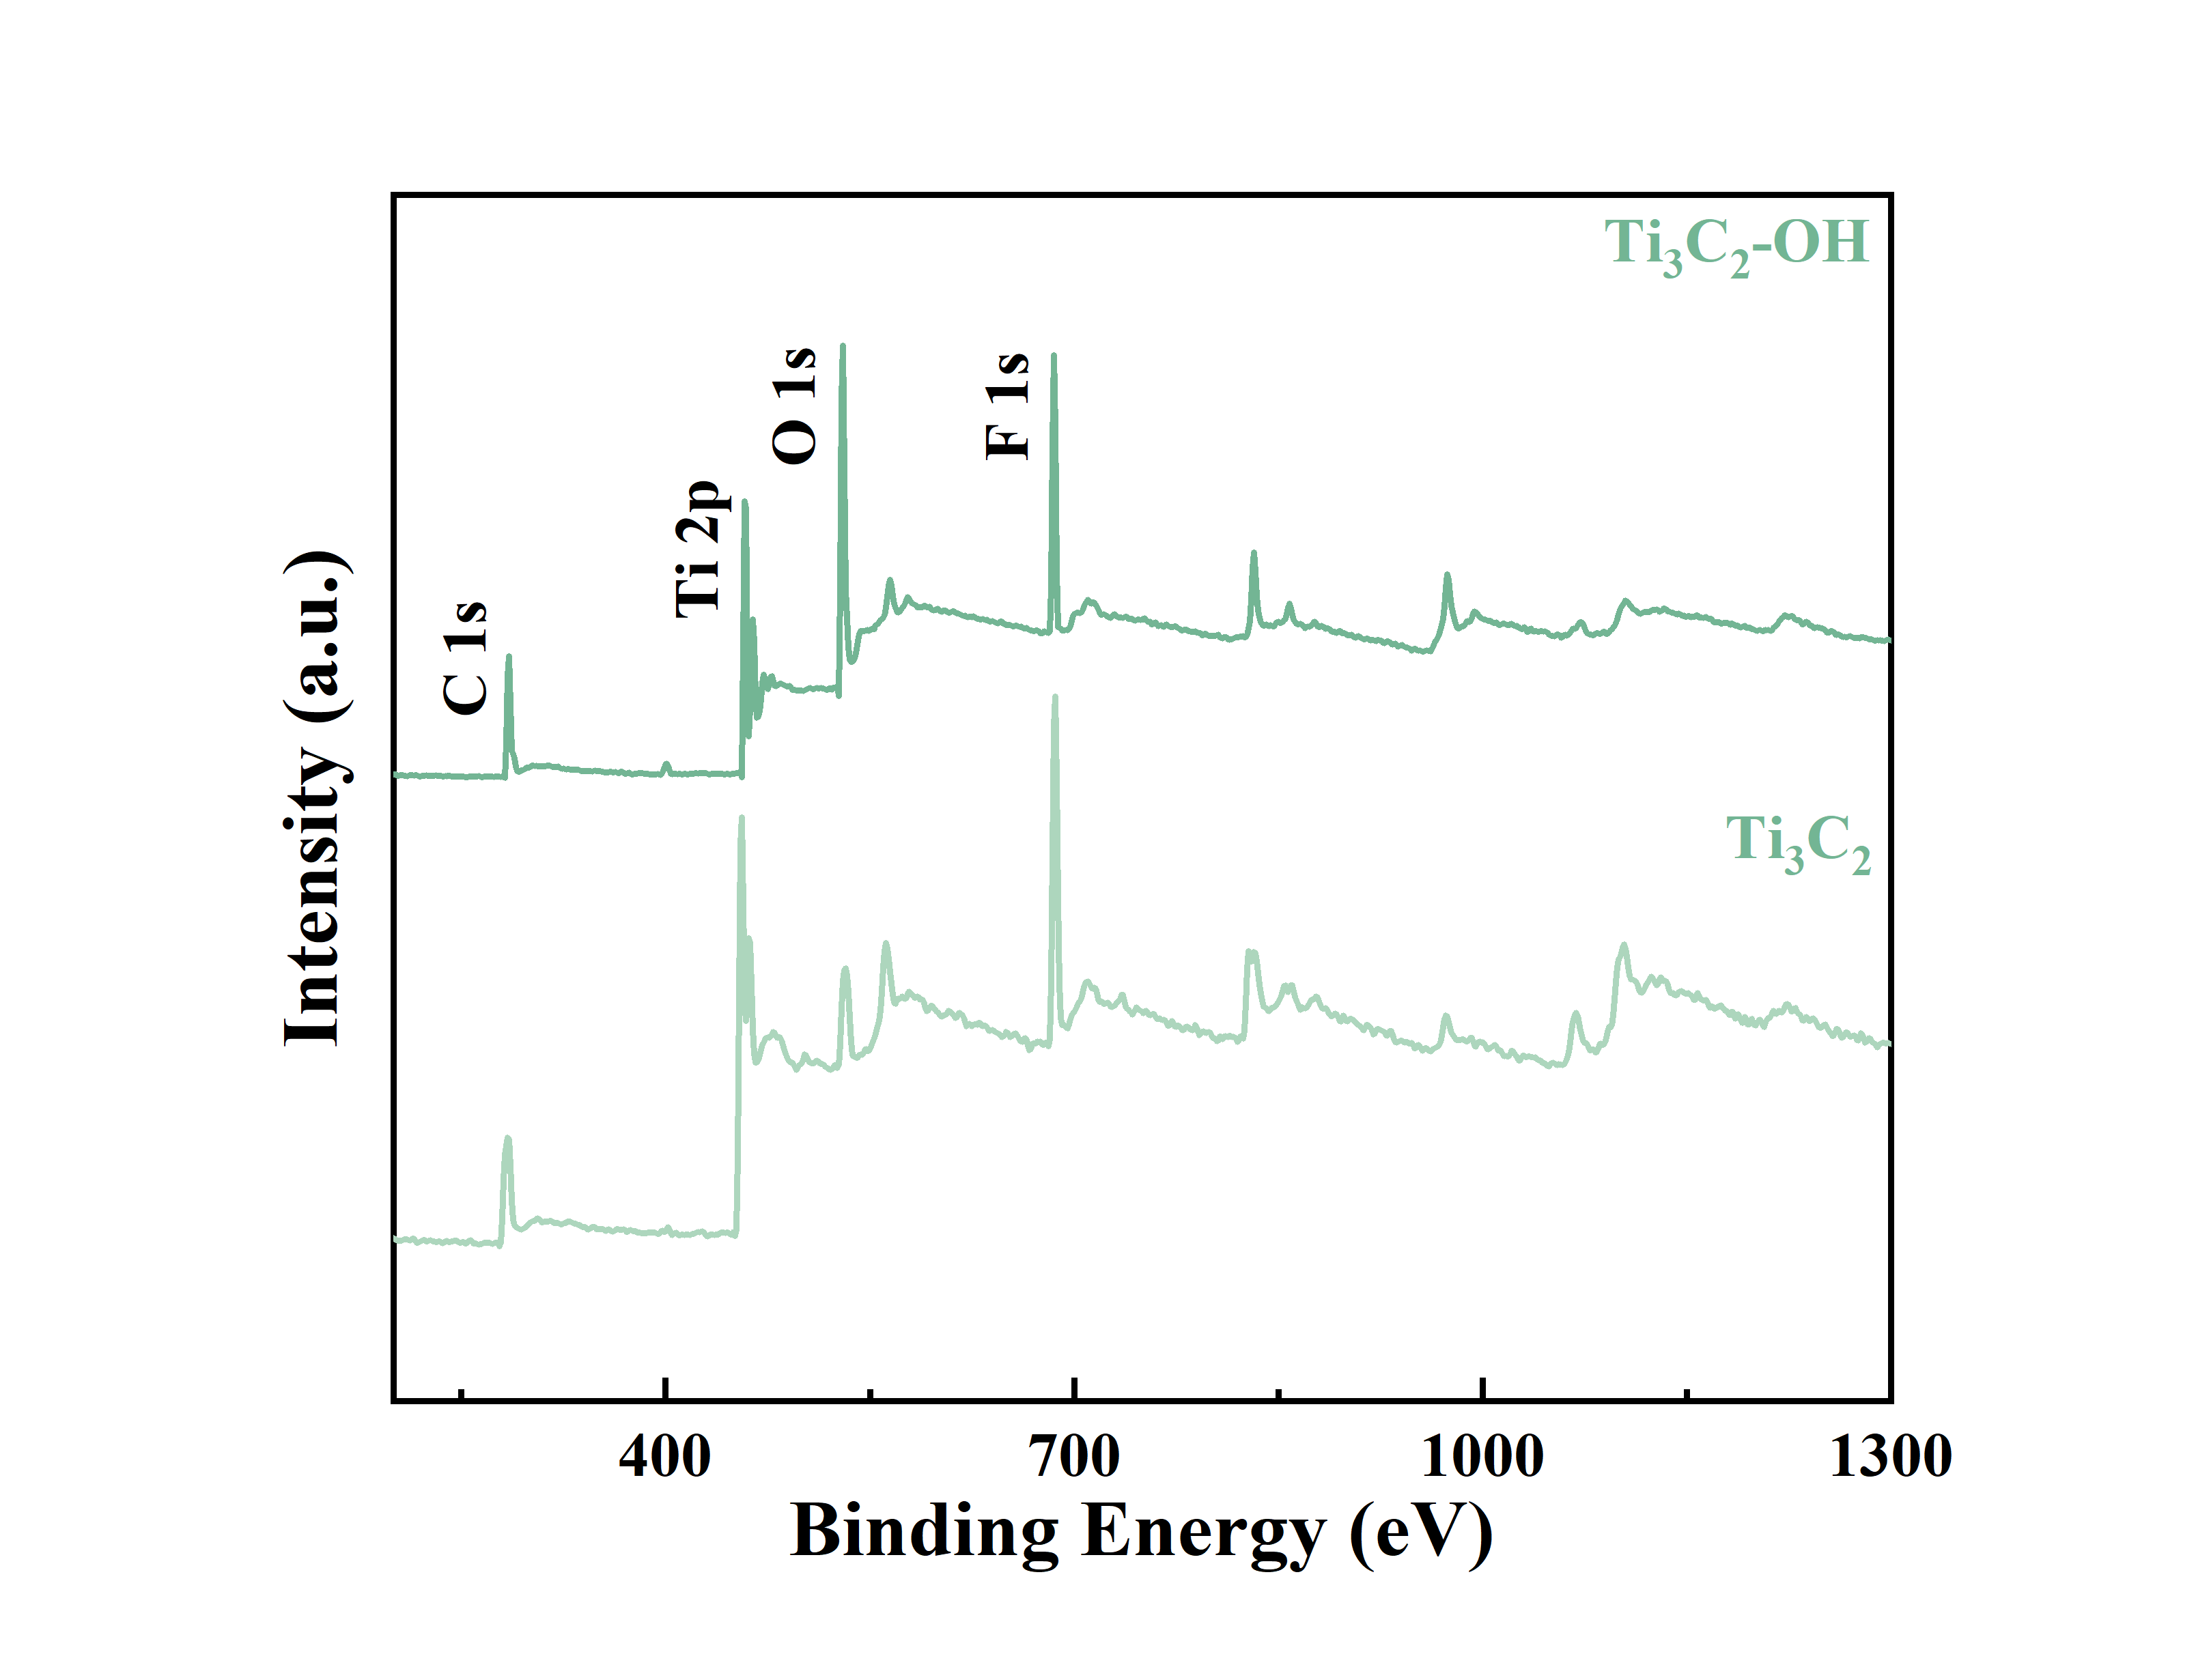


**Supplementary Fig. 12 |** XPS survey spectra of Ti3C2-OH and Ti3C2.

X-ray photoelectron spectroscopy (XPS) is employed to further illustrate the element composition of as-synthesized samples. The same elements peaks ascribed to Ti 2p, C 1s, O 1s and F 1s and the almost same surface functional bonds of Ti3C2 and Ti3C2-OH are observed in Supplementary Figs. 12, 13.


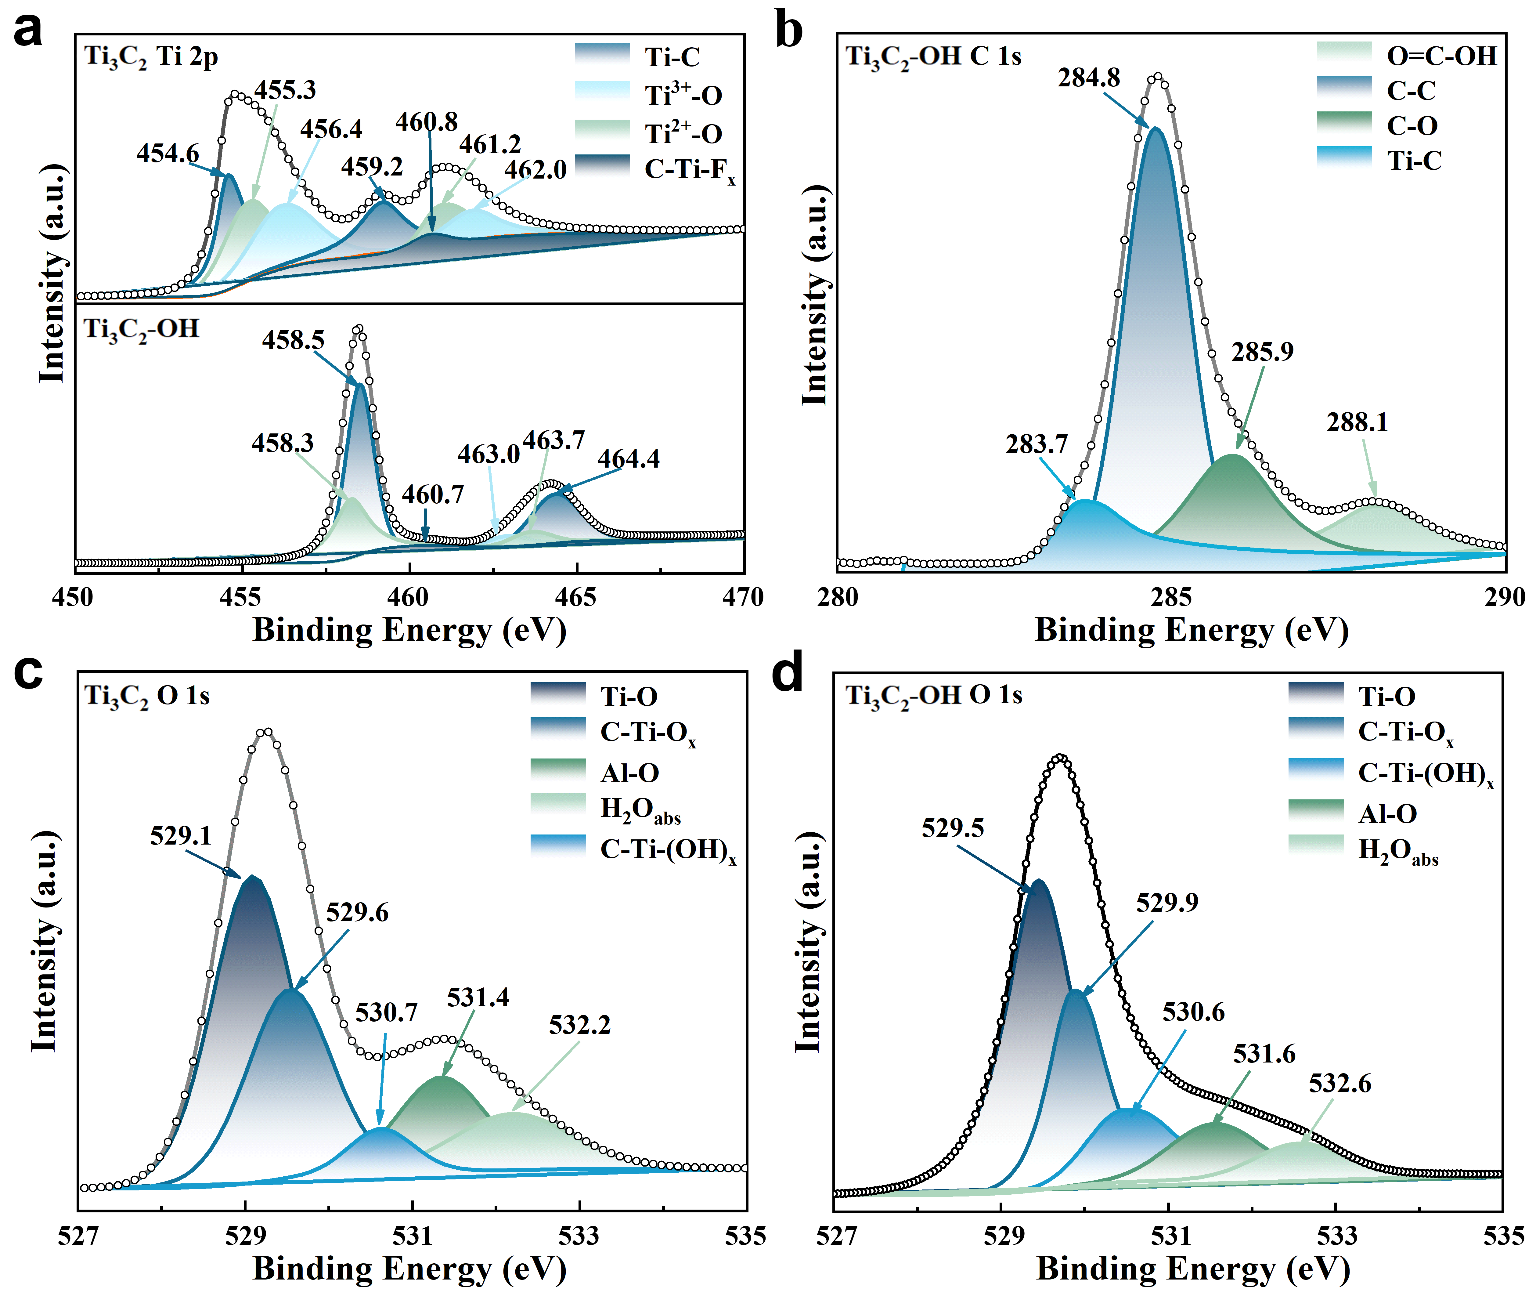


**Supplementary Fig. 13 |** XPS spectra of **a** Ti 2p of Ti3C2 and Ti3C2-OH, **b** C 1s of Ti3C2-OH, **c**-**d** O 1s of Ti3C2 and Ti3C2-OH.

As shown in Supplementary Fig. 13a, b, both exhibit Ti-C bonding in Ti3C2 and Ti3C2-OH, suggesting that the predominant configuration of Ti3C2 is maintained during the preparation of Ti3C2-OH. The XPS Ti 2p spectrum of Ti3C2-OH can be deconvoluted into Ti-C (2p3/2 at 458.5 eV and 2p1/2 at 464.4 eV), Ti2+-O (2p3/2 at 458.3 eV and 2p1/2 at 463.7 eV), Ti3+-O (2p1 at 463.0 eV). The O 1s region for the Ti3C2 and Ti3C2-OH sample is fitted by components corresponding to Ti-O, C-Ti-Ox, C-Ti-(OH)x, Al-O and H2Oads.


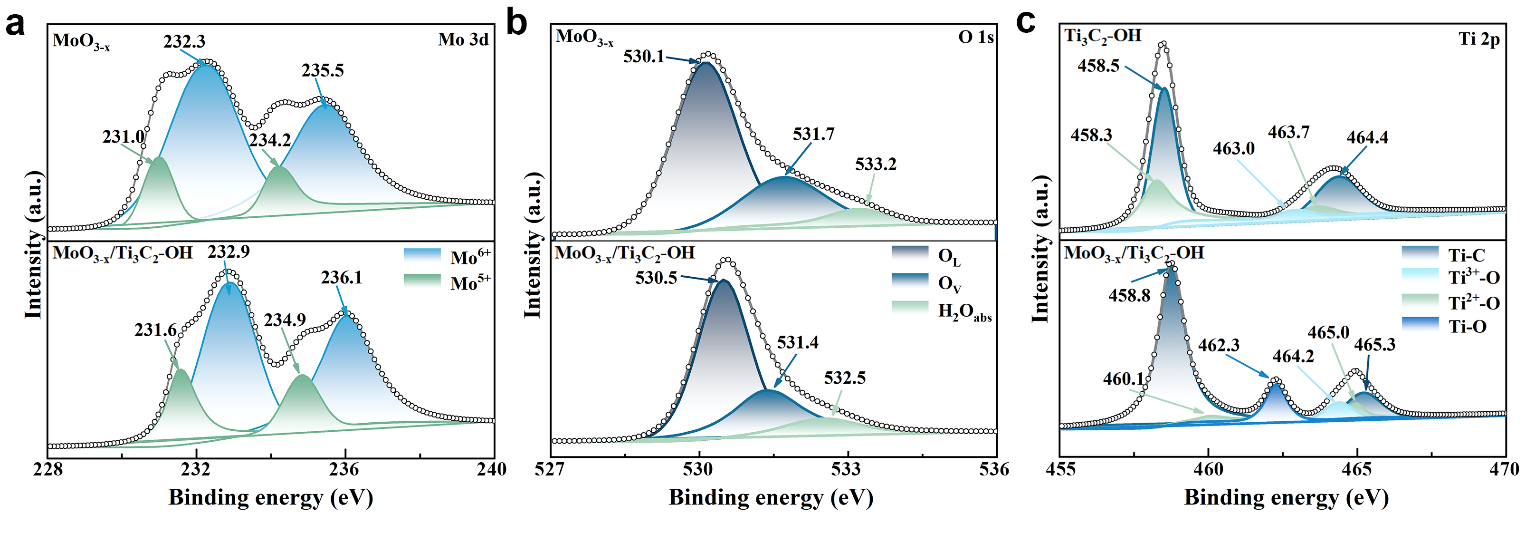


**Supplementary Fig. 14 |** XPS spectra of **a** Mo 3d, **b** O 1s and **c** Ti 2p of MoO3-x, Ti3C2-OH and MoO3-x/Ti3C2-OH.

As shown in Supplementary Fig. 14a, the Mo 3d spectrum of the MoO3-x and MoO3-x/Ti3C2-OH samples can be decomposed into four prominent peaks. Among these, two high-energy peaks are attributed to Mo6+, while the other two relatively weaker peaks correspond to the Mo5+ oxidation state caused by oxygen vacancies and unsaturated coordination. The core-level XPS spectra of the O 1s region exhibit a bifurcated profile, characterized by a predominant Mo-O lattice oxygen bonding (OL) peak centered at ~530.3 eV and an accompanying shoulder feature (Supplementary Fig. 14b). This shoulder is attributed to a convolution of oxygen vacancy (Ov) defects and surface H2O groups (H2Oads), the latter being a consequence of water molecule adsorption on the surface of the as-synthesized samples. Clearly seen that the -OH functional groups adsorb near the oxygen vacancies after complexation of Ti3C2-OH and MoO3-x, resulting in an increase in Mo-O bonds as well as a decrease in oxygen vacancies, in agreement with the EPR results.

In addition, the Mo 3d peak of MoO3-x /Ti3C2-OH shows a positive shift (≈0.6 eV, Supplementary Fig. 14a) compared to pure MoO3-x, while the Ti 2p peak (≈0.3 eV, Supplementary Fig. 14c) shows a negative shift compared to Ti3C2-OH. Here, the F peak is significantly reduced and the C-Ti-(OH)x peak is increased in Ti3C2-OH, confirming the desirable replacement of the -F group by the -O and -OH. The electron migration from MoO3-x to Ti3C2-OH effectively promotes the separation of electron-hole pairs. This interfacial charge transfer directly affects the charge density and oxidation state of Moδ+ sites, and reconstructs their electronic environment.


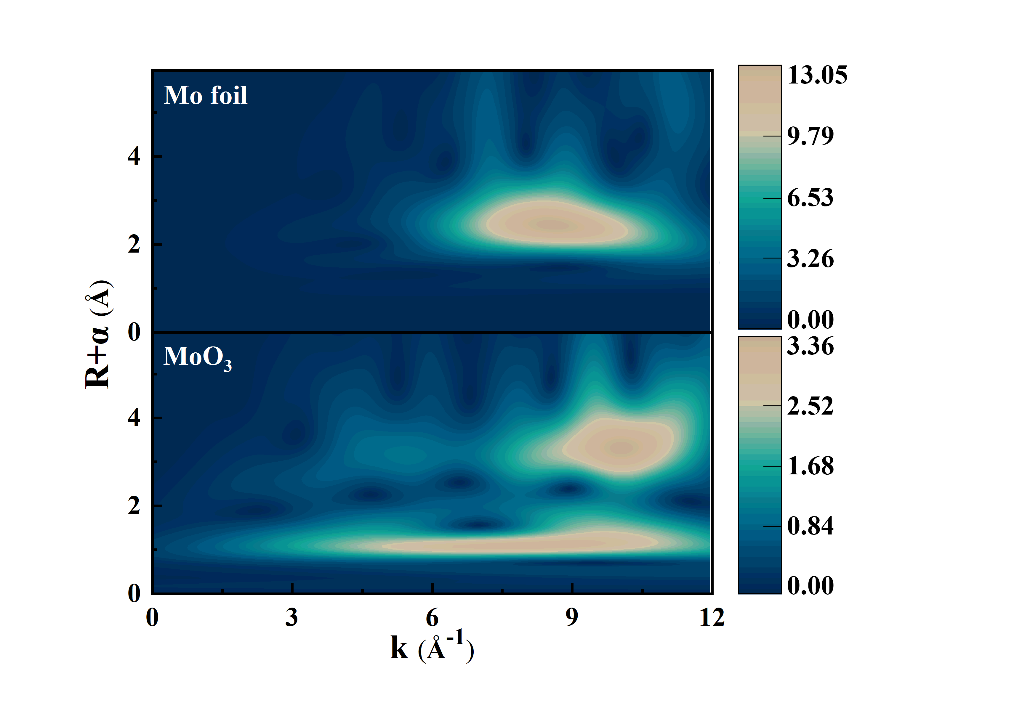


**Supplementary Fig. 15 |** WT k3-weighted χ(k)-function of the EXAFS spectra of Mo foil and MoO3.


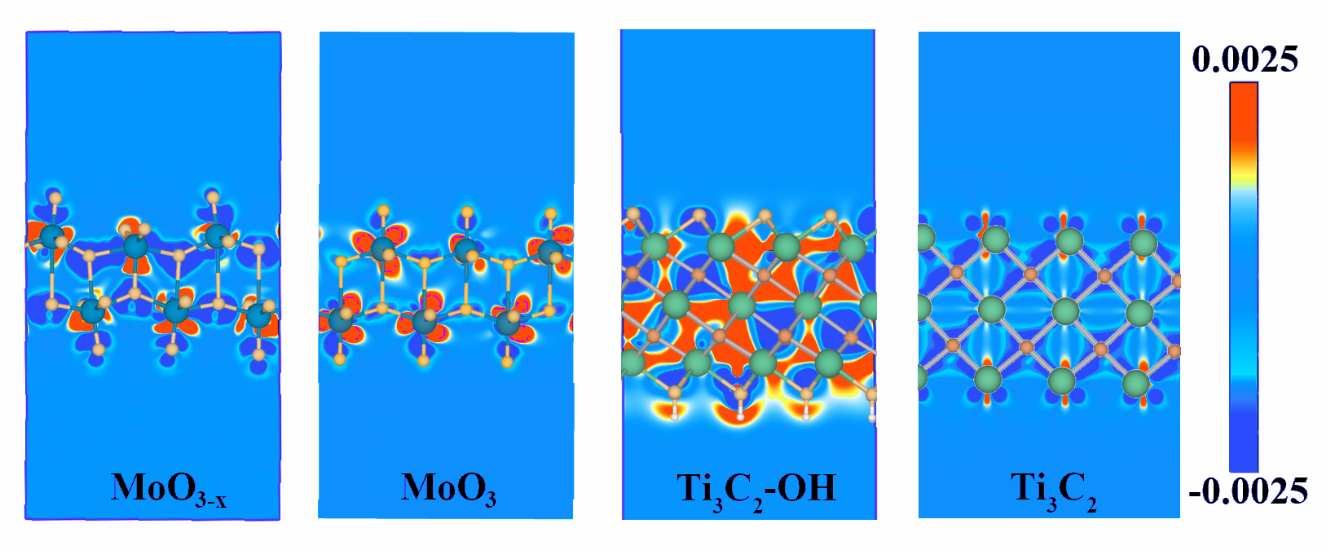


**Supplementary Fig. 16 |** 2D cross sectional view of differential charge density of MoO3-x, Ti3C2-OH, MoO3 and Ti3C2.

Red indicates electron accumulation and blue indicates electron depletion, respectively. The presence of oxygen vacancies and hydroxyl groups in Ti3C2-OH and MoO3-x is seen to lead to localized breaking of the lattice symmetry compared to the internally symmetric MoO3 and Ti3C2. Due to the different electronic properties (electron affinity and ionization energy and electronegativity) of the contact surfaces of the two subjects, the defects and functional groups lead to a local redistribution of charge at the MoO3-x/Ti3C2-OH contact interface, forming an interfacial dipole layer and generating a strong interfacial electric field.


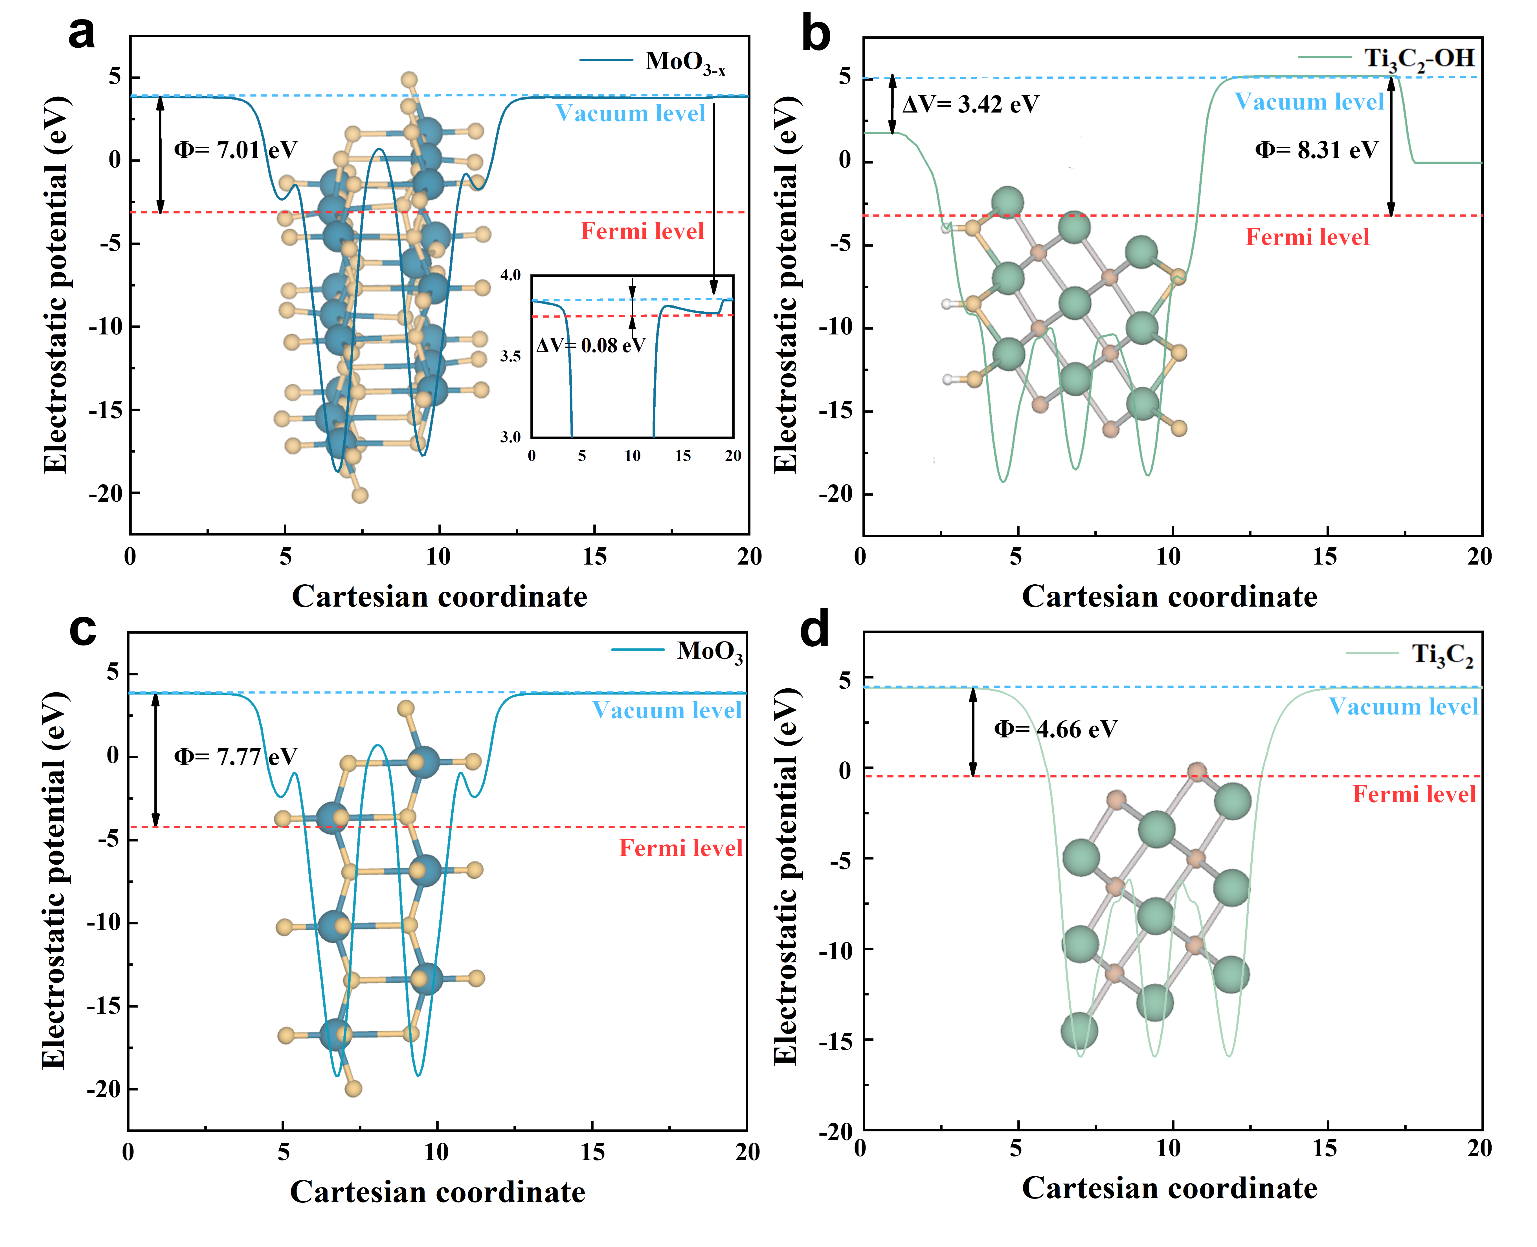


**Supplementary Fig. 17 |** **Escape and transfer of electrons within the material.** Average electrostatic potential distribution (V) of **a** MoO3-x, **b** Ti3C2-OH, **c** MoO3, **d** Ti3C2 along the out-of-plane direction.

The polarization-treated samples Ti3C2-OH and MoO3-x (Supplementary Fig. 17a, b) both reveal asymmetric electrostatic potential distributions compared to Ti3C2 and MoO3 (Supplementary Fig. 17c, d), where the hydroxyl surfaces and the oxygen-deficient surfaces show a lower vacuum. This leads to spontaneous polarization from the hydroxyl to the oxygen base layer and from the defective to the defect-free layer at the terminals of the two separate material surfaces, respectively.


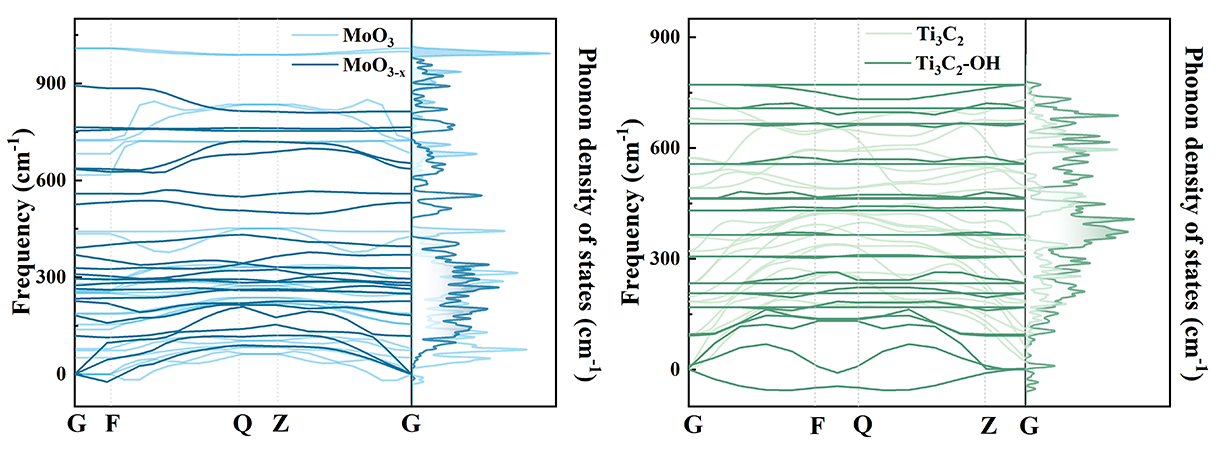


**Supplementary Fig. 18 | The distribution of lattice vibration quanta.** Calculated the phonon dispersions and phonon density of states.


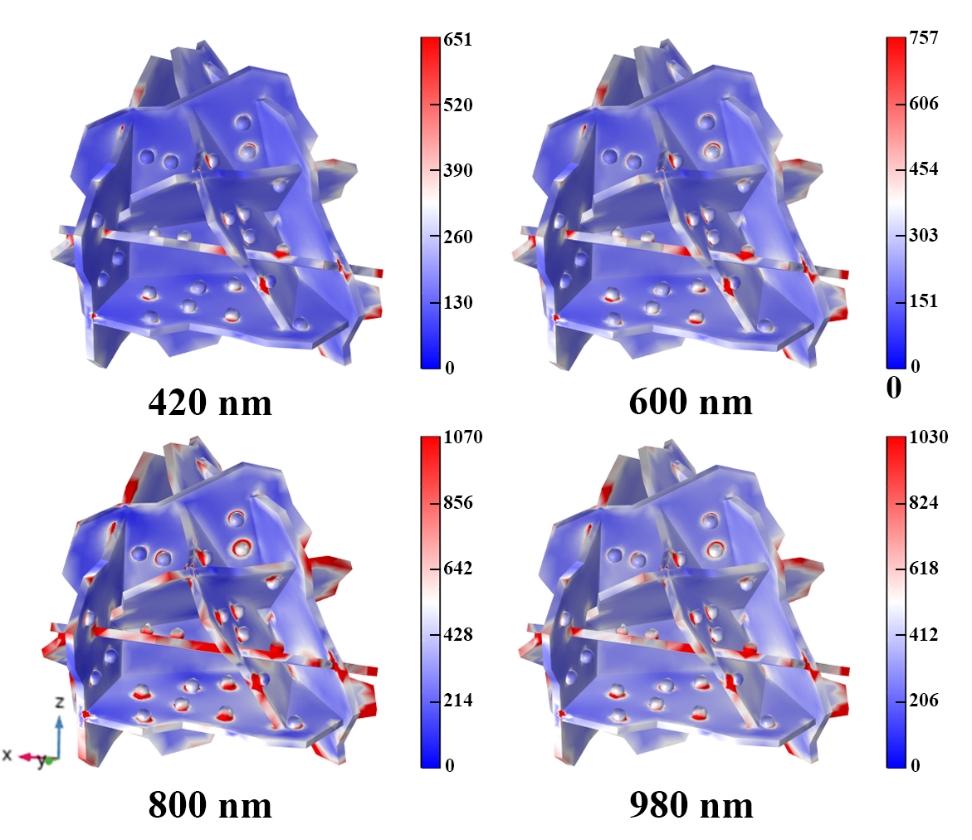


**Supplementary Fig. 19 | COMSOL finite element method.** Electric field distributions of MoO3-x/Ti3C2-OH under 420 nm, 600 nm, 800nm and 980 nm excitation.

The sample model, placed in the X-Y plane, exhibits a significant local electromagnetic field enhancement under the excitation of the incident light (propagating along the Z direction and polarized by a voltage of 5V/m in the Y direction). Similar to the classical plasmonic metal-semiconductor system, the double plasmon can efficiently converge and amplify the incident light field, and the coupling-induced near-field effects are efficient at a distance of about 10 nm, which is great significant for the enhanced effects of 0D/2D high comparative area contact modes. In addition, 800 nm is identified as the irradiation source for driving the LSPR characteristics to probe the plasmon-induced photothermal effect.


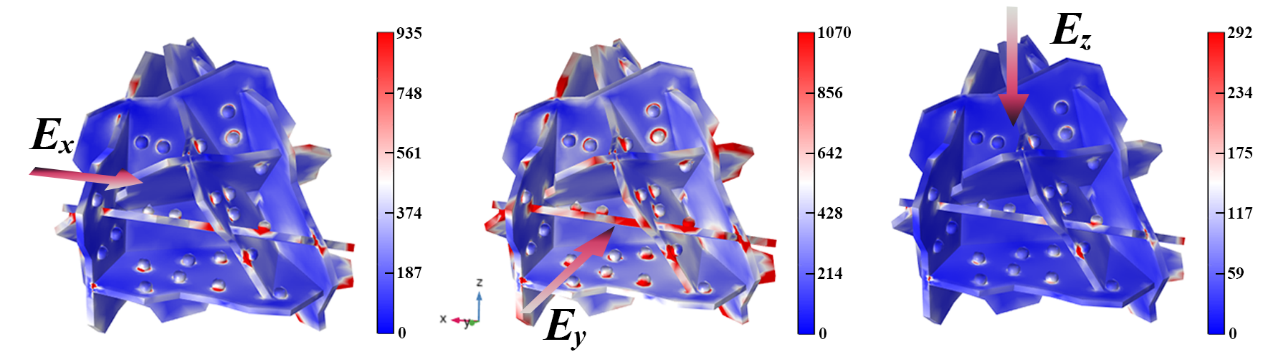


**Supplementary Fig. 20 | COMSOL finite element method.** Electric field distributions of MoO3-x/Ti3C2-OH under different polarized directions at 800 nm.

Considering the plasmonic near-field resonance modes, the electric field intensity of the MoO3-x/Ti3C2-OH model is compared under different polarized directions, revealing that the double plasmonic heterojunction system exhibits a strong near-field behavior oscillating along the polarized direction in the Y direction.


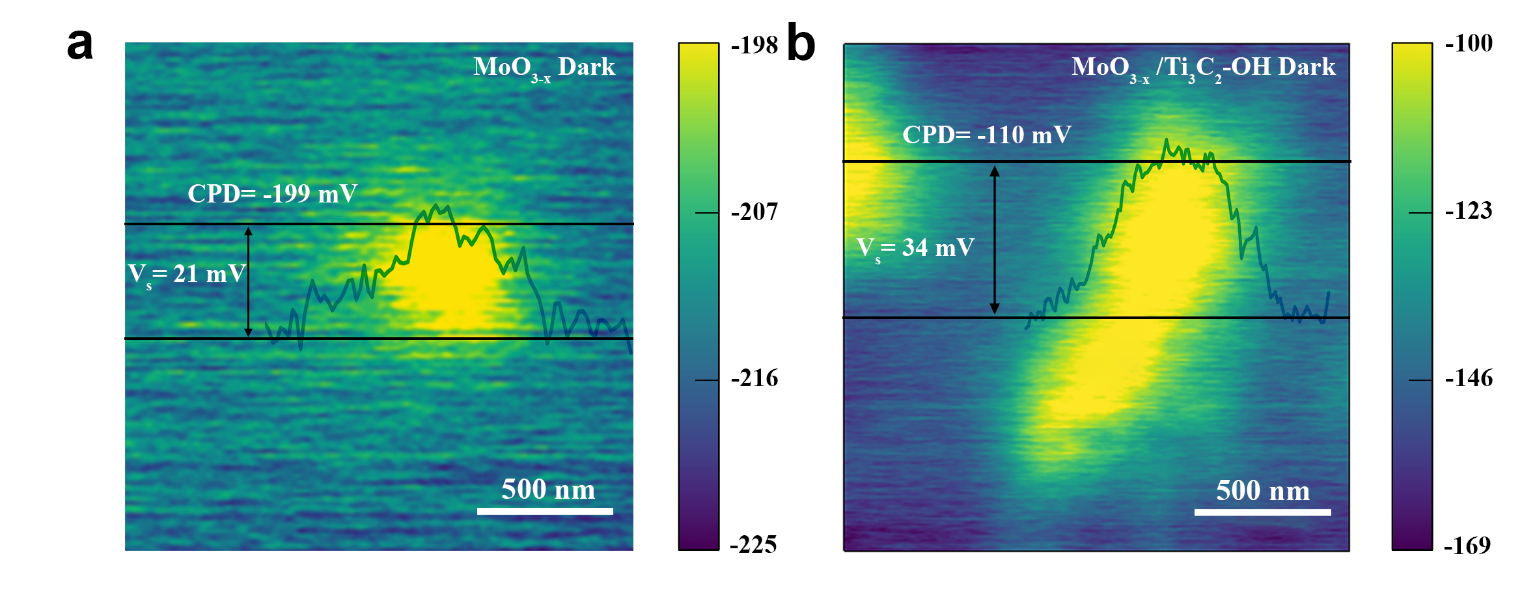


**Supplementary Fig. 21 | KPFM measurement**. Surface potentials of MoO3-x and MoO3-x/Ti3C2-OH under dark conditions.


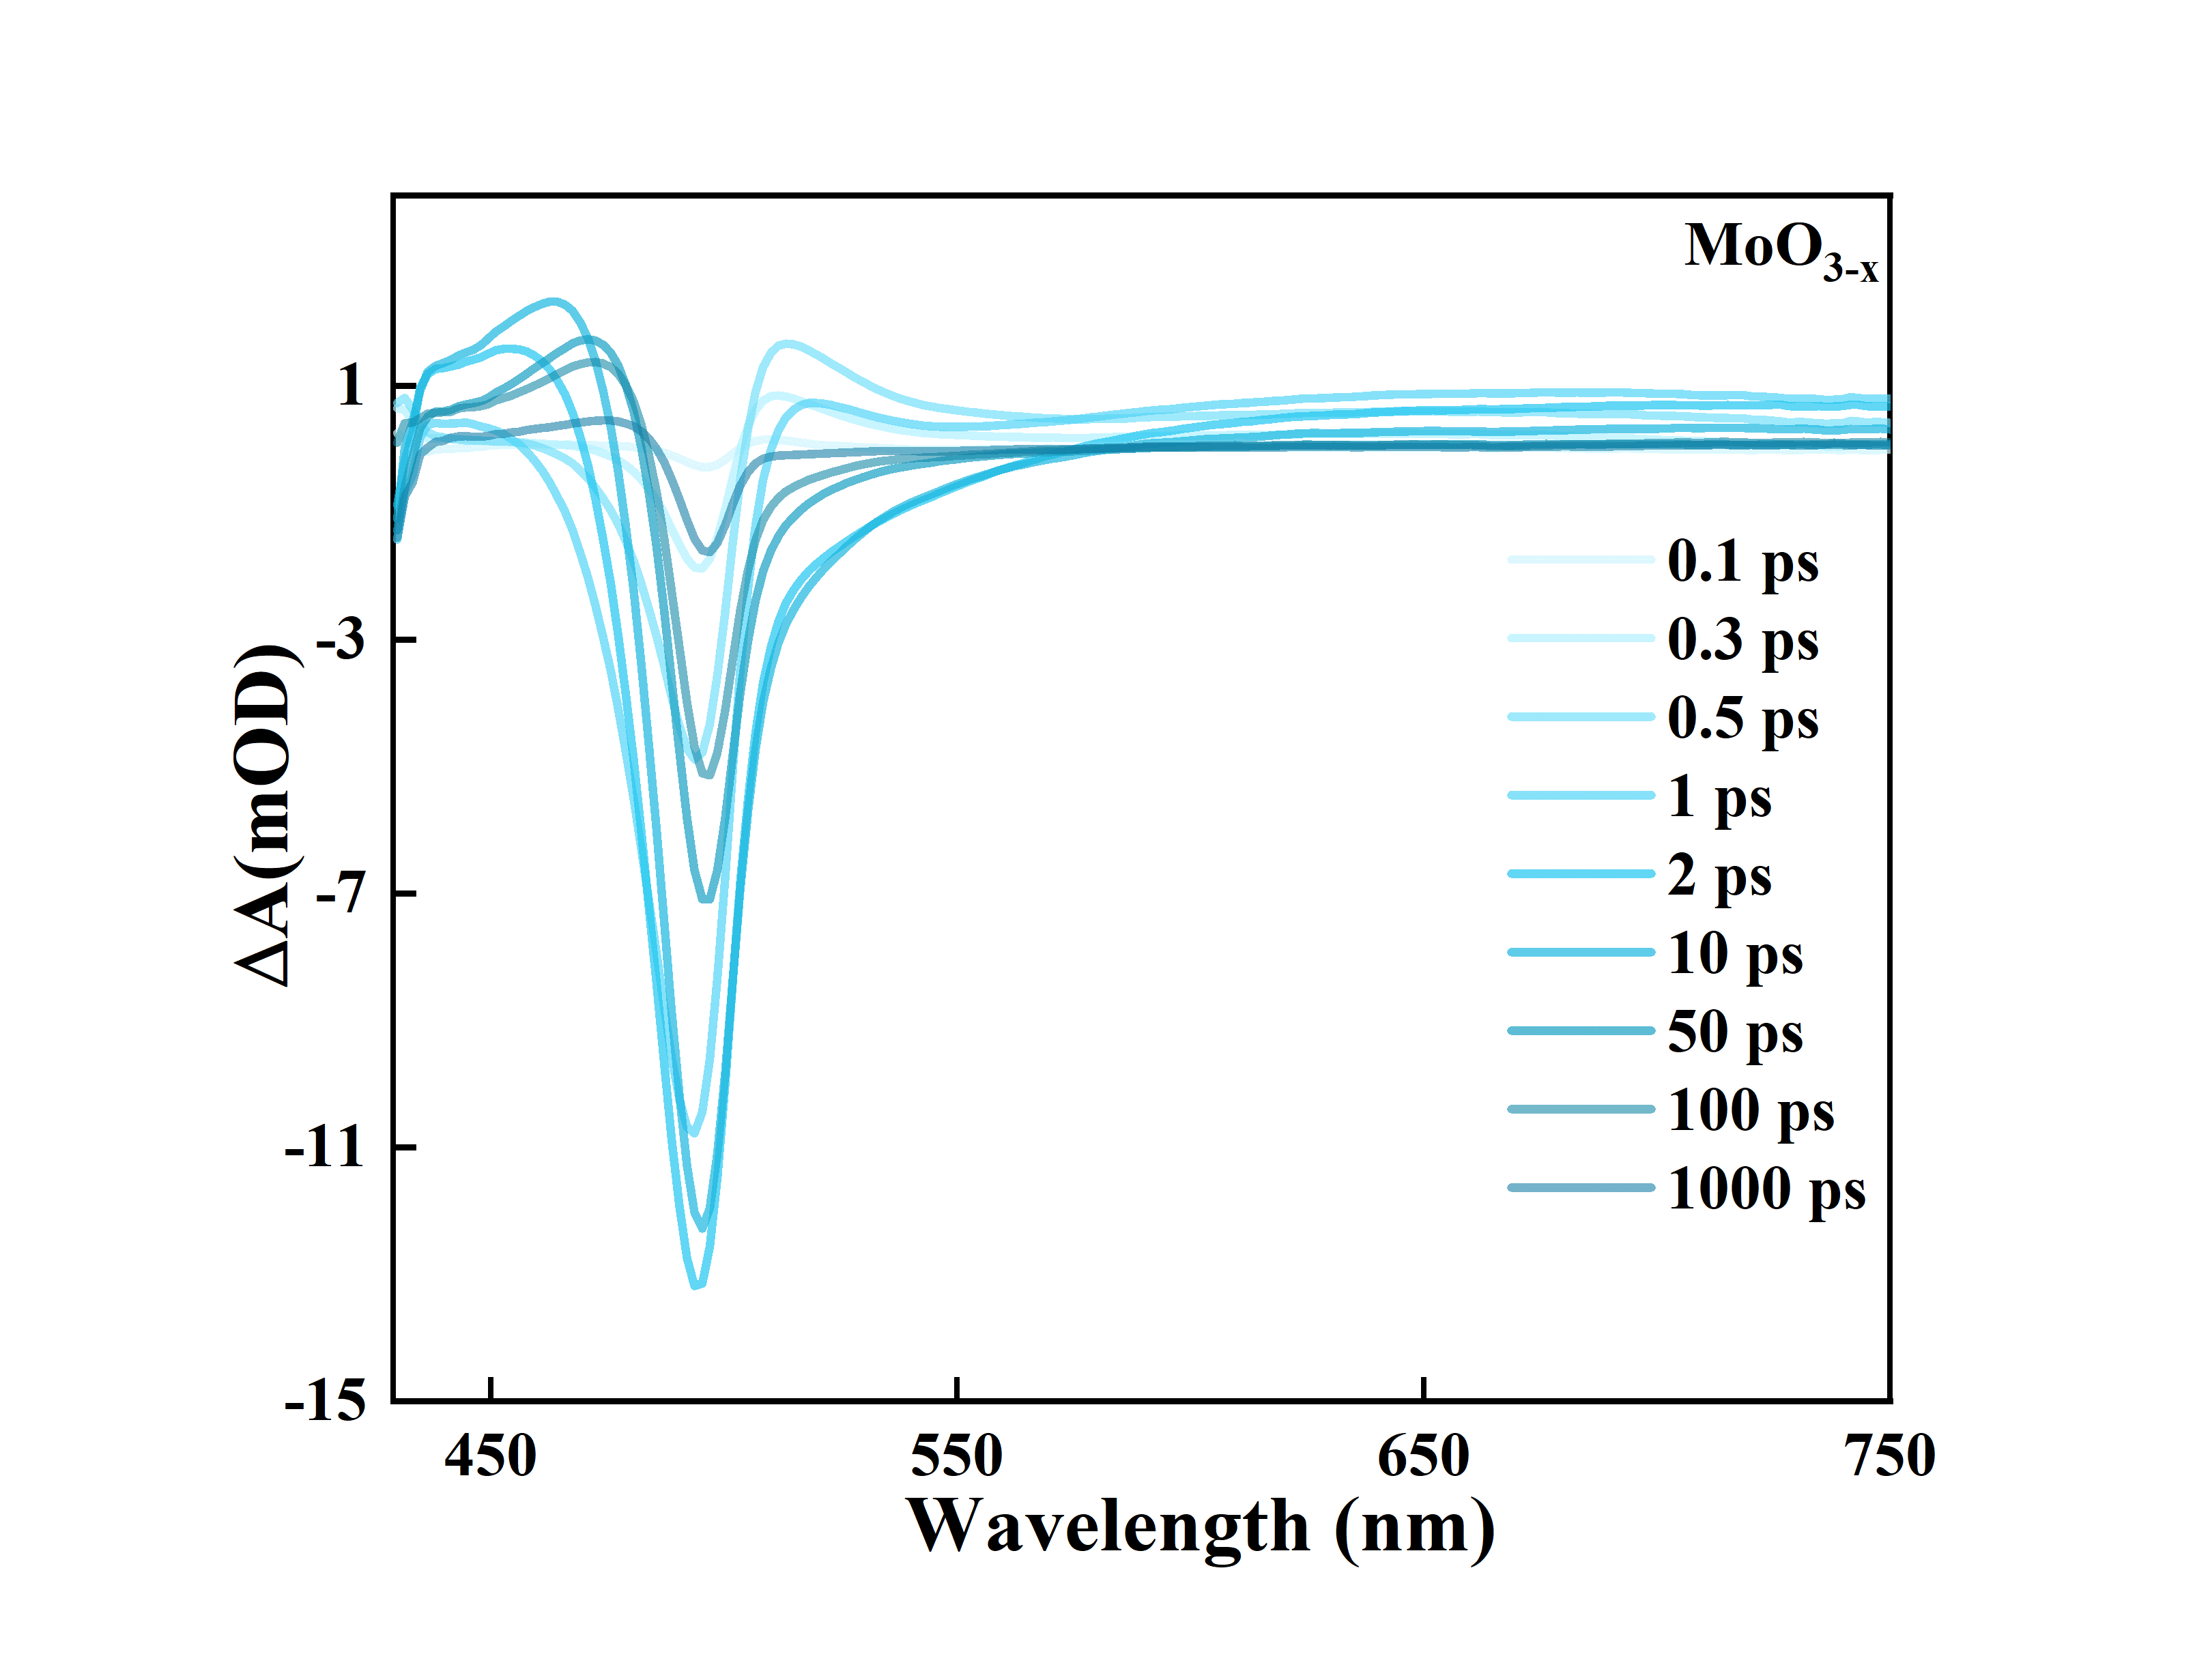


**Supplementary Fig. 22 | Transient absorption characteristics.** Representative spectra at different delay time for MoO3-x.


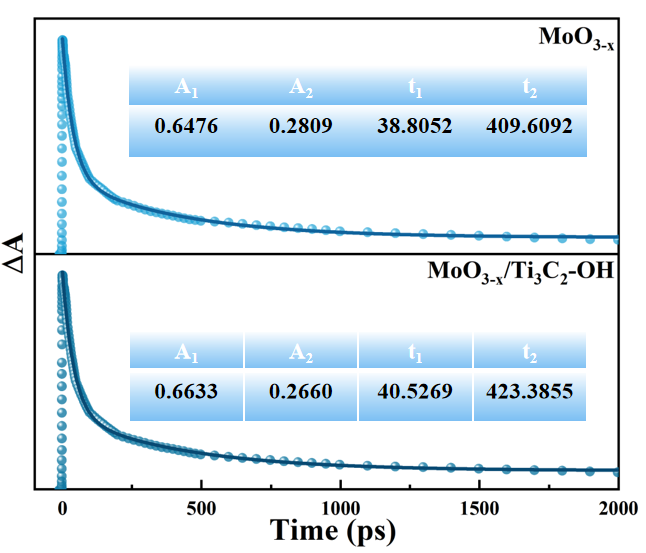


**Supplementary Fig. 23 | Lifetime analysis.** TA kinetics curves of MoO3-x and MoO3-x/Ti3C2-OH at with the probe wavelength at 494 nm.

Fitting the kinetic traces at the bleach center (494 nm), a biexponential decay curve can be obtained, corresponding to electron-phonon scattering (τ1= 41 ps) and phonon-phonon scattering (τ2= 423 ps) during the relaxation of plasmon-induced hot electrons, respectively. The hot electrons relax within a few picoseconds to vibrational modes via the electron-phonon coupling, and the longer τ1 for the heterojunction compared to MoO3-x implies a weakening of the electron-phonon coupling that favors the electron transport process. The longer time-scale decay arises from the phonon-phonon scattering of thermal charge carriers, which corresponds to the dissipation of thermal energy from the metal lattice to the surrounding medium, enhancing the reaction kinetics5,6.


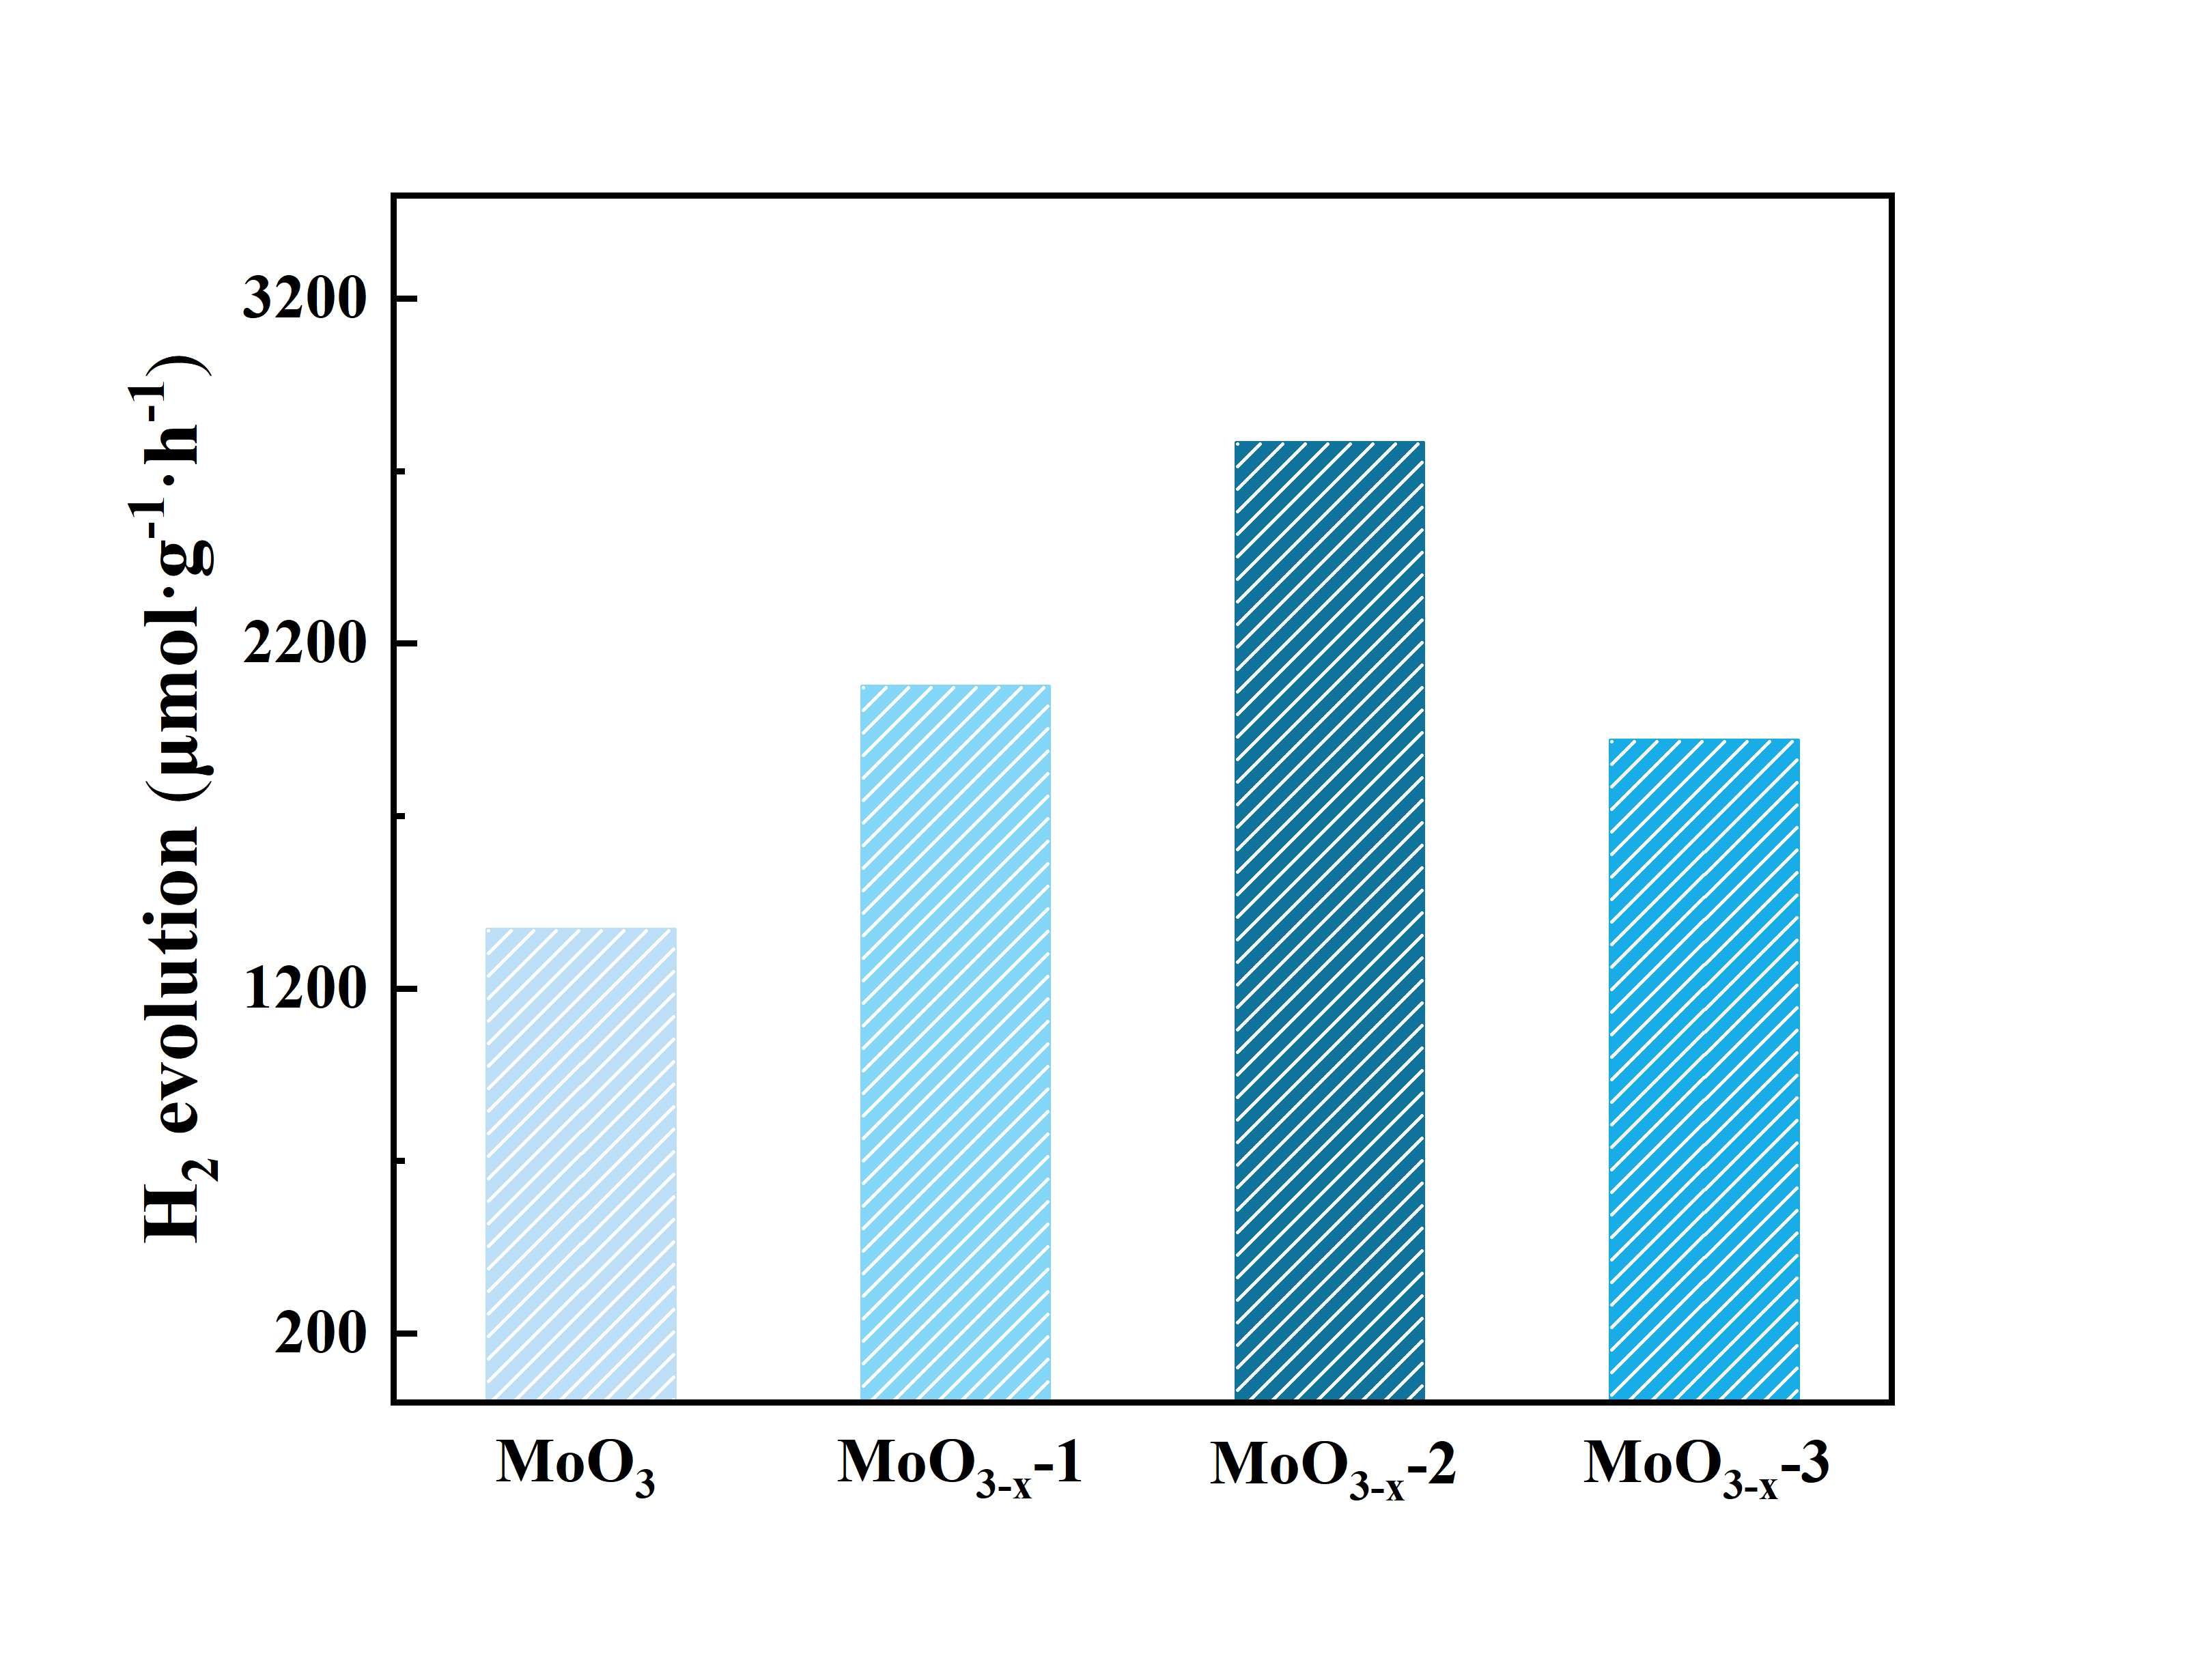


**Supplementary Fig. 24 | AB hydrolysis performance.** Hydrogen production of MoO3-x at different oxygen defect concentrations (increasing oxygen defect concentrations from MoO3-x-1 to MoO3-x-3).


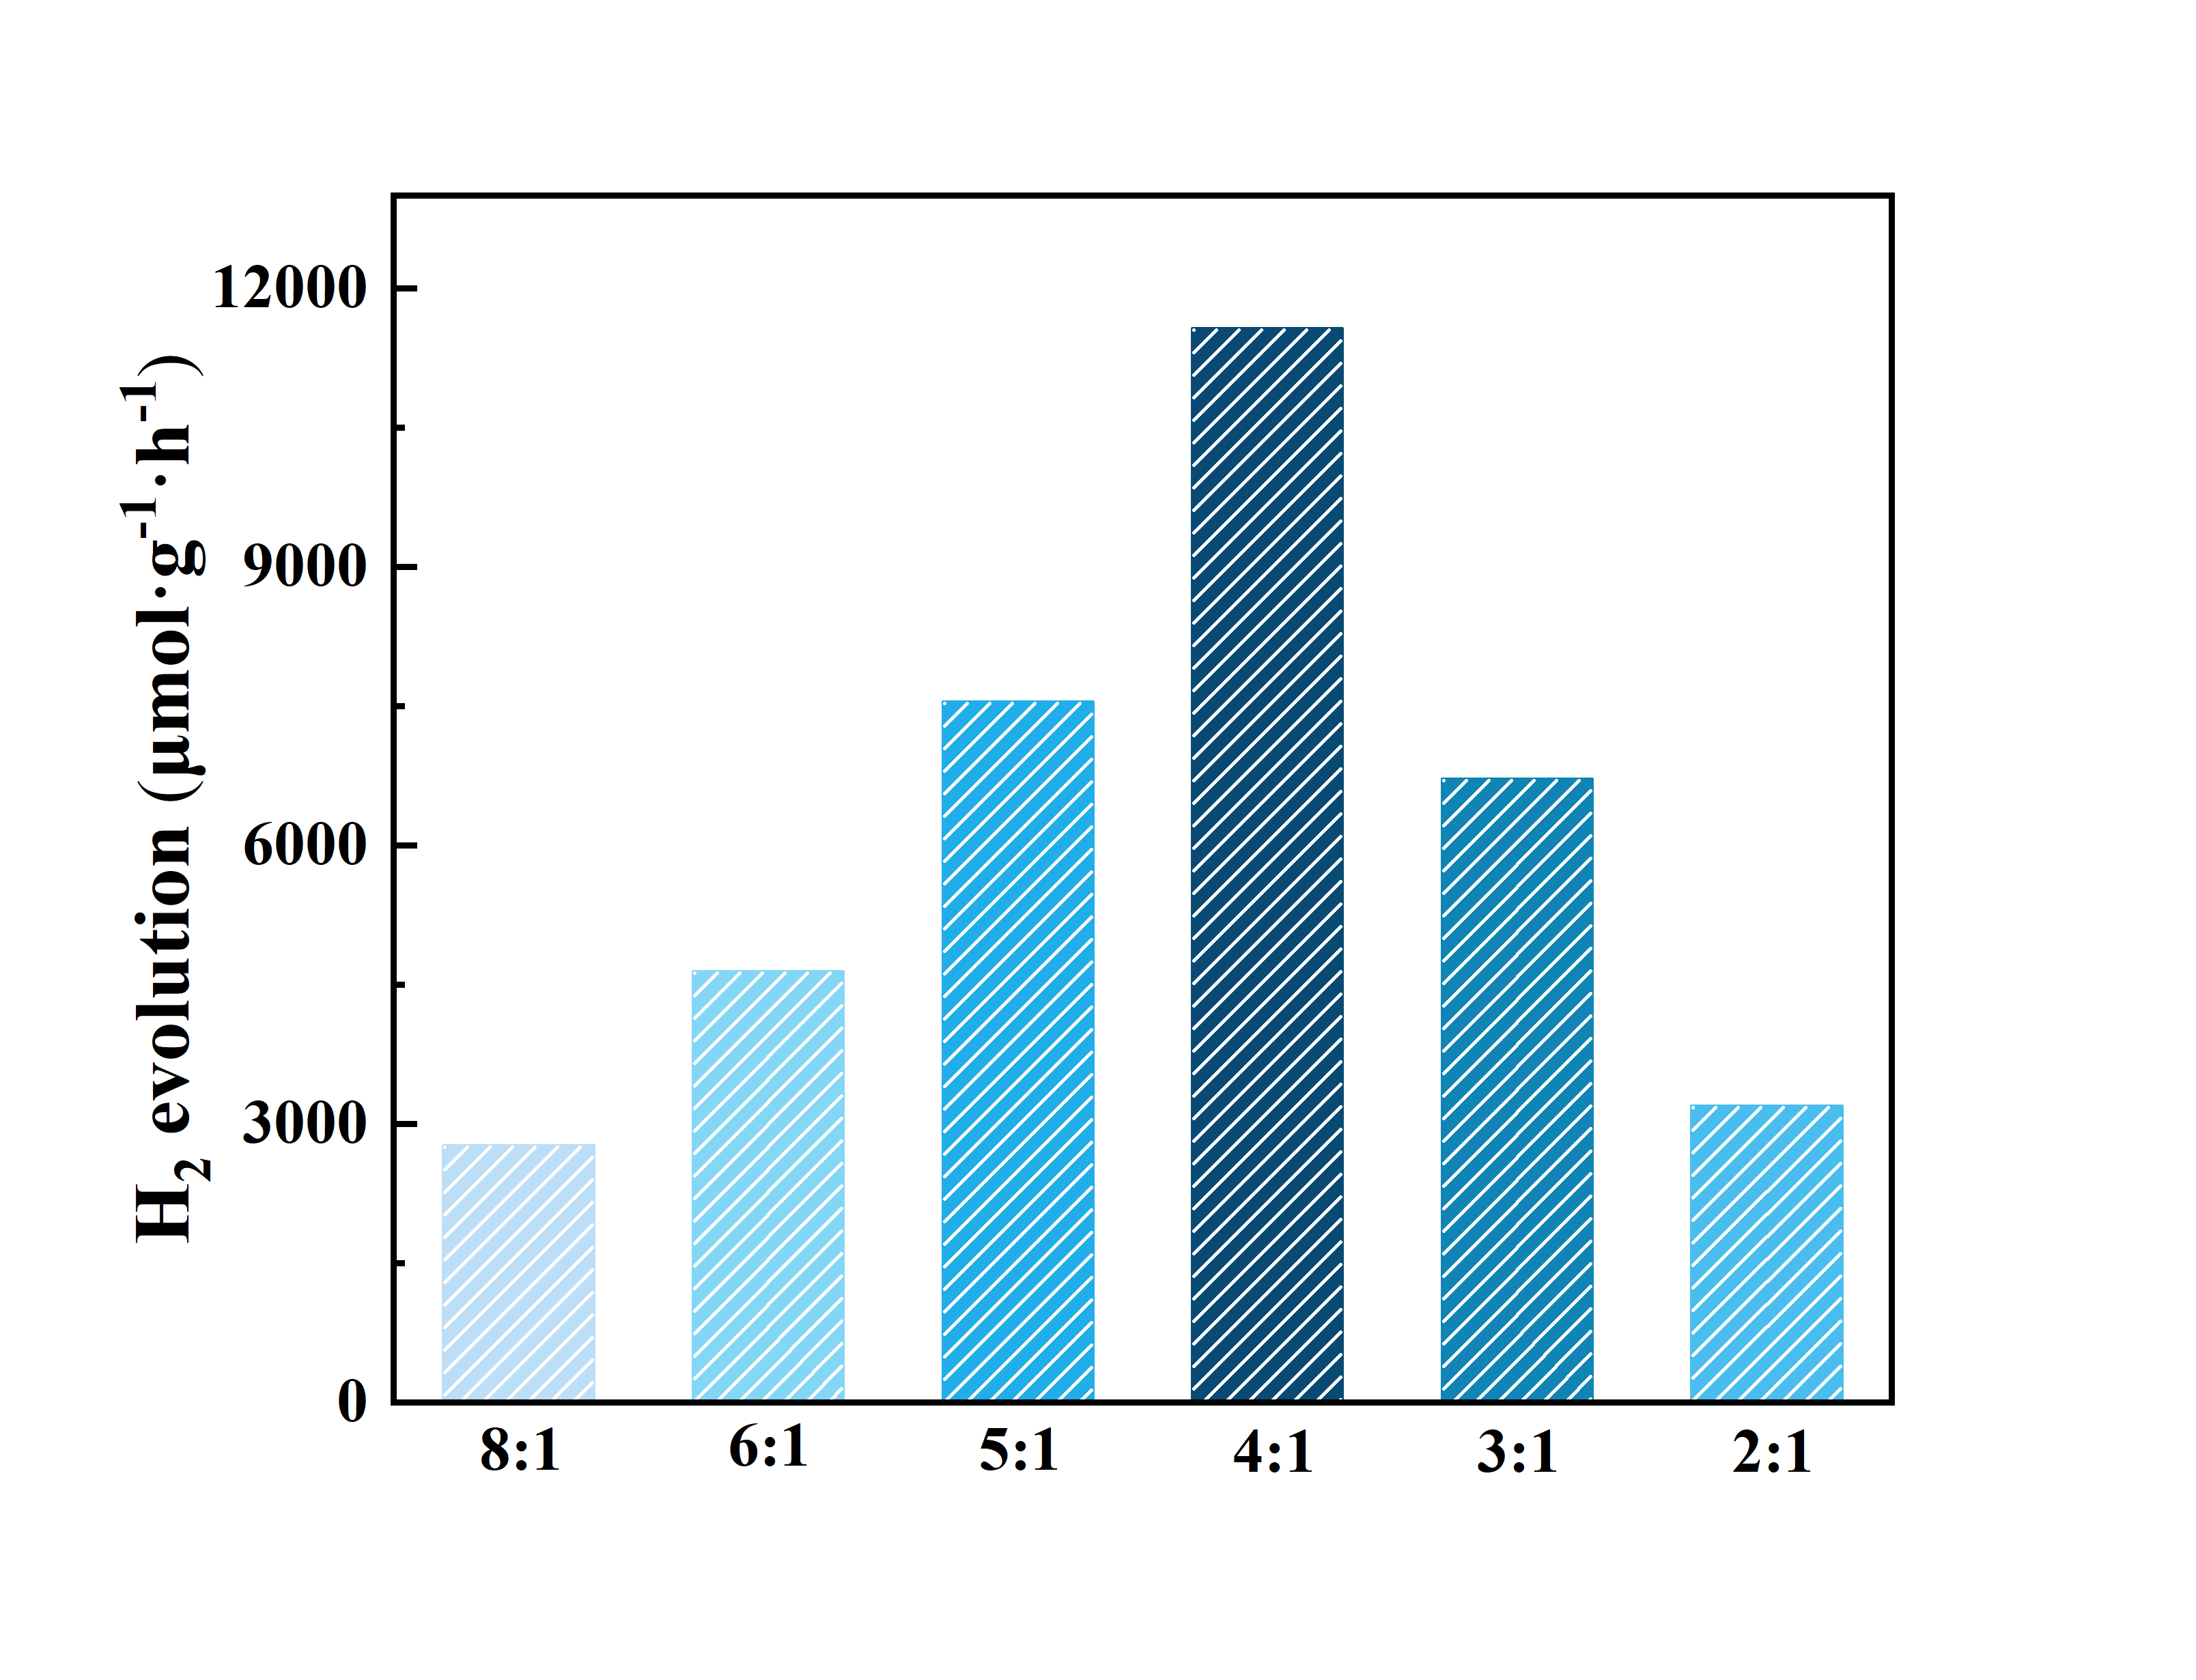


**Supplementary Fig. 25 | AB hydrolysis performance.** Hydrogen production of MoO3-x/Ti3C2-OH with different proportions.


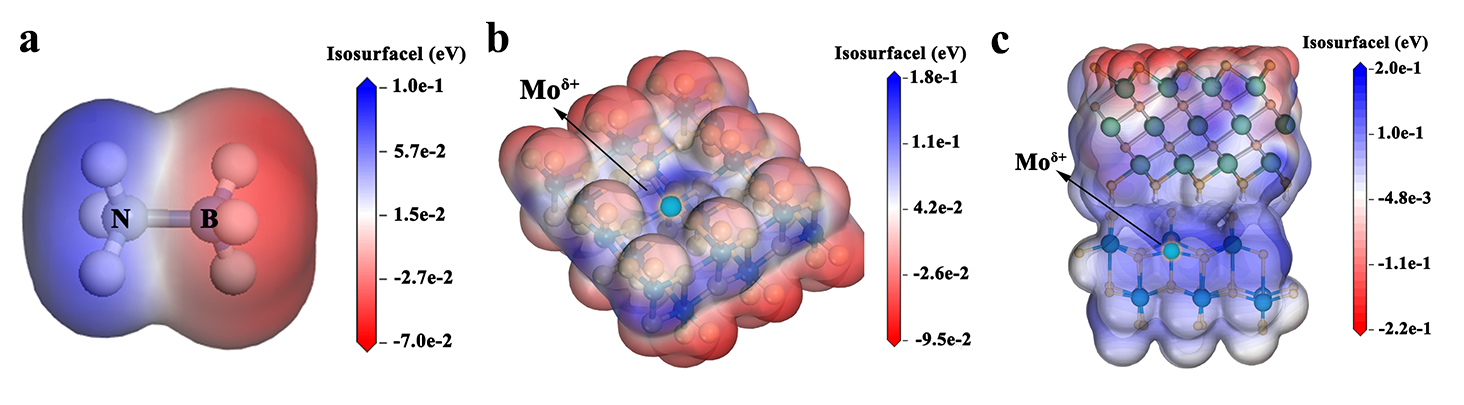


**Supplementary Fig. 26 | Charge distribution of molecules.** Electrostatic potential surfaceof **a** AB, **b** MoO3-x, **c** MoO3-x/Ti3C2-OH.


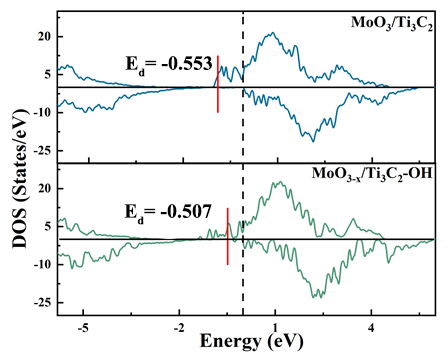


**Supplementary Fig. 27 |** D-band centers of MoO3/Ti3C2 and MoO3-x/Ti3C2-OH.


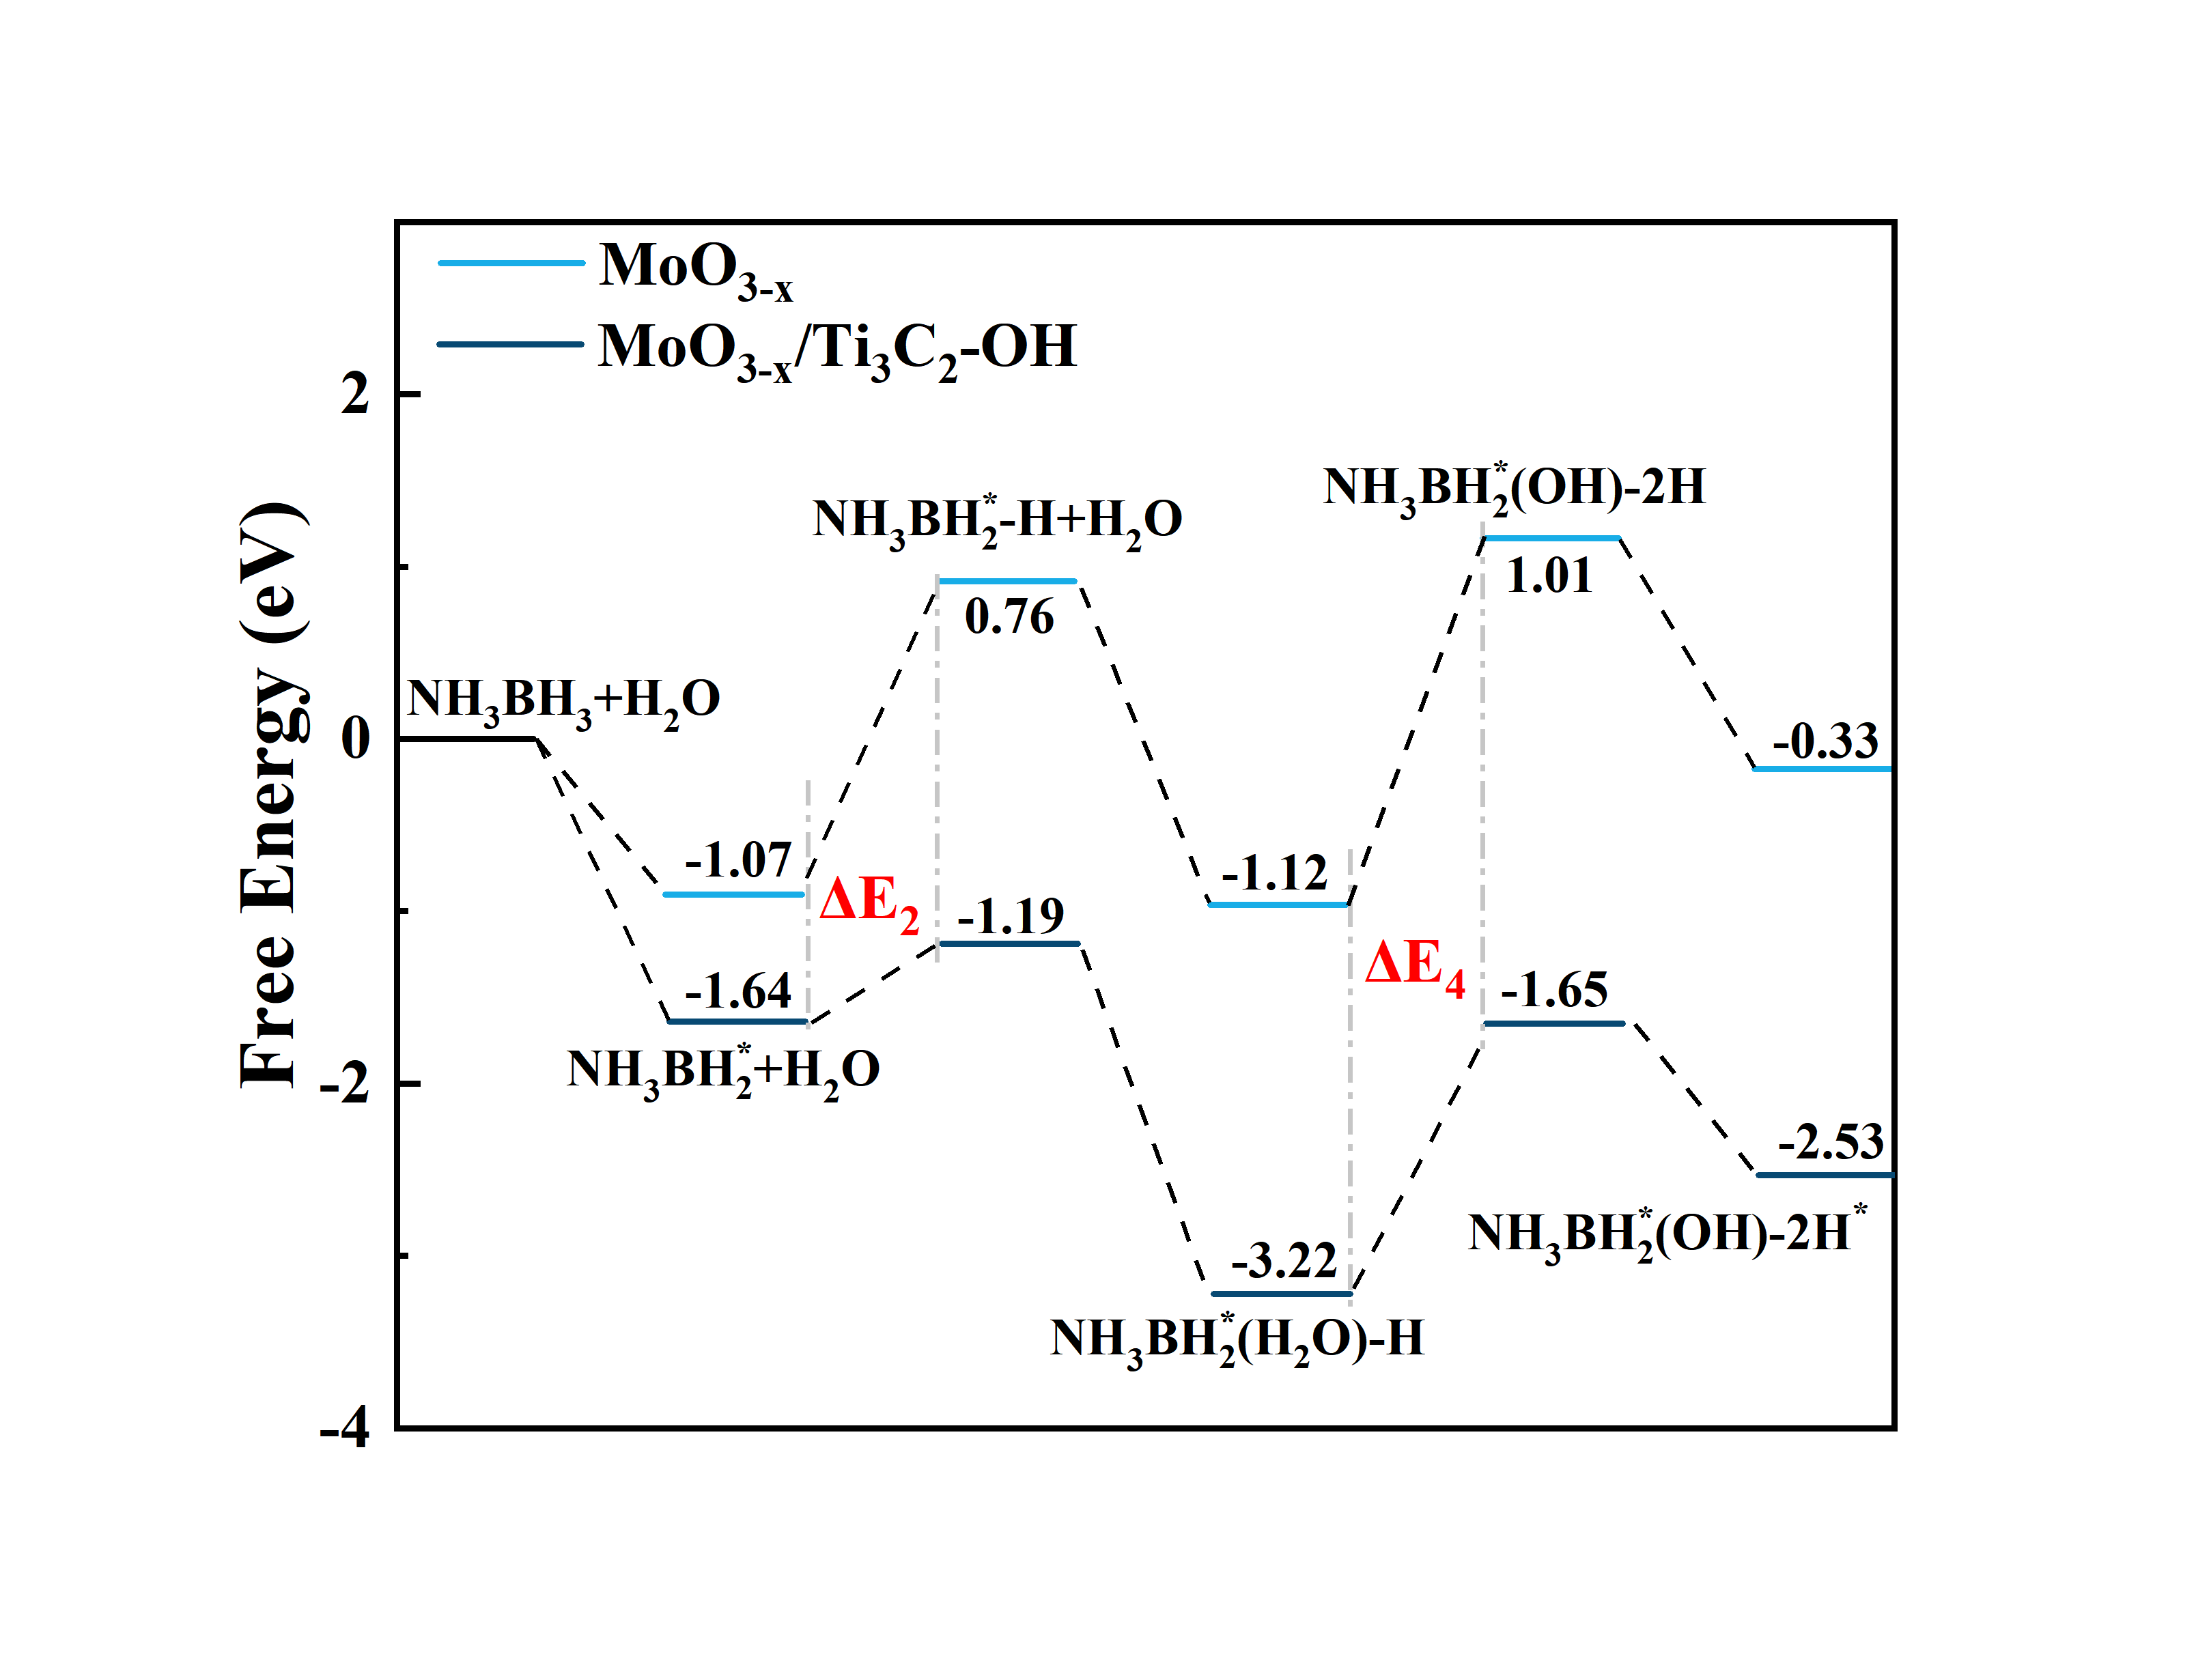


**Supplementary Fig. 28 | The thermodynamic behavior of the reaction.** Gibbs free energy of different intermediate states of MoO3-x and MoO3-x/Ti3C2-OH.

When the NH3BH3-H2O system is adsorbed at the MoO3-x/Ti3C2-OH interface, the energy required for B-H bond cleavage in NH3BH3 (ΔE2= 0.45) is less than that in MoO3-x (ΔE2=1.83), and the energy required for O-H bond breaking in H2O (ΔE4 = 1.57) is less than that in MoO3-x (ΔE4 =2.13).

**References**

1. Peng, Q. et al. Unique Lead Adsorption Behavior of Activated Hydroxyl Group in Two-Dimensional Titanium Carbide. *J.Am.Chem.Soc.* **136**, 4113-4116 (2014).
2. Li, H., Li, X., Liang, J. and Chen, Y. Hydrous RuO2‐Decorated MXene Coordinating with Silver Nanowire Inks Enabling Fully Printed Micro‐Supercapacitors with Extraordinary Volumetric Performance. *Adv. Energy Mater.* **9**, (2019).
3. Wang, Z. et al. Highly stable lithium anodes from recycled hemp textile. *Chem. Comm.* **58**, 1946-1949 (2022).
4. Wang, X., Sun, G., Li, N. and Chen, P. Quantum dots derived from two-dimensional materials and their applications for catalysis and energy. *Chem. Soc. Rev.* **45**, 2239-2262 (2016).
5. Link, S. and El-Sayed, M. A. Optical Properties and Ultrafast Dynamics of Metallic Nanocrystals. *Annu. Rev. Phys. Chem.* **54**, 331-366 (2003).
6. Wang, J. et al. Strong vibrational coupling in room temperature plasmonic resonators. *Nat. Commun.* **10**, (2019).
